# Supplementary material for: Proteome-Wide Alterations of Asymmetric Arginine Dimethylation Associated With Pancreatic Ductal Adenocarcinoma Pathogenesis
Source: Front Cell Dev Biol. 2020 Dec 3;8:545934. doi: 10.3389/fcell.2020.545934 (PMC7744470; doi:10.3389/fcell.2020.545934)
Supplement: Supplementary Table 1 — A list of total ADMA-containing peptides identified in HPDE6c7 and PANC-1 cells. The protein accessions, names, methylation sites, Andromeda scores, peptide intensities and previous reports of ADMA-containing peptides identified in HPDE6c7 and PANC-1 cells were listed in this table. [file Table_1.XLSX]

## Sheet: ADMA sites
Supplemental Table S1. A list of total ADMA-containing peptides identified in HPDE6c7 and PANC-1 cells.
Accessions	Protein names	Gene names	Dimethyl (R) Probabilities	Number of Dimethyl (R)	Sequence window	Position in peptide	Position within protein	Charge	Localization prob	Score	Intensity HPDE6c7 #1	Intensity HPDE6c7 #2	Intensity HPDE6c7 #3	Intensity PANC-1 #1	Intensity PANC-1 #2	Intensity PANC-1 #3	Previous reports in Homo sapiens	Previously identified as CARM1 substrates
A6NGB9	WIPF3	WAS/WASL-interacting protein family member 3	GR(1)SALLADIQQGTR	1	VSTDTSSLRRADPKGRSALLADIQQGTRLRK	2	46	3	0.99999	50.088	2855400	2966100	5396900	0	0	0	Mol. Cell. Proteomics 13:372-387(2014)
A6NHQ4	C17orf96	Uncharacterized protein C17orf96	METLCPAPR(0.883)LAVPASPR(0.117)	1	_______METLCPAPRLAVPASPRGSPCSPT	9	9	3	0.882695	55.173	2455600	2761300	2383900	0	0	0	Mol. Cell. Proteomics 13:372-387(2014)
A7KAX9-2	ARHGAP32	Rho GTPase-activating protein 32	DFAFYNPR(1)LQGK	1	PLHRLPNRDFAFYNPRLQGKSLYSYAGLAPR	8	1346	2	1	169.09	103140000	92952000	144510000	361380000	173890000	254180000	Nat Commun 8:15571(2017);	Nat Commun 8:15571(2017);
O00268	TAF4	Transcription initiation factor TFIID subunit 4	TPTATTSGIR(1)ATLTPTVLAPR	1	TQSLSRTPTATTSGIRATLTPTVLAPRLPQP	10	424	3	0.999961	99.021	13834000	10787000	16863000	37061000	44783000	15428000	Mol. Cell. Proteomics 13:372-387(2014);Nat Commun 8:15571(2017);	Nat Commun 8:15571(2017);
O14490-7	DLGAP1	Disks large-associated protein 1	KGLSGSR(1)SHHHGVTCDSACDSLSHHSDR(1)	2	________MKGLSGSRSHHHGVTCDSACDSL	7	8	3	1	40.669	0	0	0	389740000	4281400	0
O14490-7	DLGAP1	Disks large-associated protein 1	KGLSGSR(1)SHHHGVTCDSACDSLSHHSDR(1)	2	VTCDSACDSLSHHSDRKPYLLSPVEHHPADH	28	29	3	1	40.669	0	0	0	389740000	4281400	0
O14641	DVL2	Segment polarity protein dishevelled homolog DVL-2	FSSSTEQSSASR(1)LLK	1	TMSRFSSSTEQSSASRLLKRHRRRRKQRPPR	12	231	3	1	100.55	0	0	0	0	3237600	4795600
O14686	KMT2D	Histone-lysine N-methyltransferase 2D	QLQLQQQR(1)MQLAQK	1	DSRLLQERQLQLQQQRMQLAQKLQQQQQQQQ	8	3727	2	1	364.92	69680000	64687000	73754000	206000000	63699000	52404000	Mol. Cell. Proteomics 13:372-387(2014);Nat Commun 8:15571(2017);	Nat Commun 8:15571(2017);
O14908	GIPC1	PDZ domain-containing protein GIPC1	PGSGPQLGTGR(0.093)GTLR(0.907)	1	RPGSGPQLGTGRGTLRLRSRGPATVEDLPSA	15	244	3	0.907253	49.929	0	1782500	3944300	0	3777000	0	Mol. Cell. Proteomics 13:372-387(2014);Nat Commun 8:15571(2017);
O14979-3	HNRNPDL	Heterogeneous nuclear ribonucleoprotein D-like	ASR(1)GGGNHQNNYQPY	1	RGRGRGQQSTYGKASRGGGNHQNNYQPY___	3	232	3	1	113.22	31250000	14026000	34365000	134790000	56312000	63713000
O15042-3	U2SURP	U2 snRNP-associated SURP motif-containing protein	NLLALIHR(1)		KTKRILRRNLLALIHRMIEFVVREGPMFEAM	8	24	2	1	88.591	1904200	2004700	14689000	18283000	4253900	3279500
O15320-8	CTAGE5;MIA2	cTAGE family member 5;Melanoma inhibitory activity protein 2	NVYPPR(1)GFPPYLPPR(1)PGFFPPPPHSEGR	2	GPPPAPFAMRNVYPPRGFPPYLPPRPGFFPP	6	677	5	1	85.801	7460400	0	11513000	32746000	18201000	20416000	Nat Commun 8:15571(2017);	Nat Commun 8:15571(2017);
O15320-8	CTAGE5;MIA2	cTAGE family member 5;Melanoma inhibitory activity protein 2	NVYPPR(1)GFPPYLPPR(1)PGFFPPPPHSEGR	2	RNVYPPRGFPPYLPPRPGFFPPPPHSEGRSE	15	686	5	0.999997	85.801	7460400	0	11513000	32746000	18201000	20416000	Nat Commun 8:15571(2017);	Nat Commun 8:15571(2017);
O43464-2	HTRA2	Serine protease HTRA2, mitochondrial	ACLTSGTPGPR(0.964)AQLTAVTPDTR(0.036)	1	VTEPRACLTSGTPGPRAQLTAVTPDTRTREA	11	80	3	0.964408	52.298	3122800	3311600	5085300	0	0	0	Nat Commun 8:15571(2017);	Nat Commun 8:15571(2017);
O43896	KIF1C	Kinesin-like protein KIF1C	LQGLQGSGGR(0.005)GGGLR(0.995)	1	RLQGLQGSGGRGGGLRRPPARFVPPHDCKLR	15	963	3	0.995407	93.011	7781700	5088500	9786000	15023000	0	3728800	Nat Commun 8:15571(2017);
O43896	KIF1C	Kinesin-like protein KIF1C	QEQLR(1)LQGLQGSGGR(0.958)GGGLR(0.042)	1;2	KQEQLRLQGLQGSGGRGGGLRRPPARFVPPH	15	958	4	0.958485	100.19	9752600	9640800	11229000	3171800	54524000	1237000	Nat Commun 8:15571(2017);
O43896	KIF1C	Kinesin-like protein KIF1C	QEQLR(1)LQGLQGSGGR(0.958)GGGLR(0.042)	2	AFRRGRLRWLKQEQLRLQGLQGSGGRGGGLR	5	948	4	1	98.507	9752600	9640800	11229000	3171800	9019400	1237000	Nat Commun 8:15571(2017);
O60293-4	ZFC3H1	Zinc finger C3H1 domain-containing protein	PSFWER(1)SHLALDR	1	SSSLSESSPRPSFWERSHLALDRFRFRGRPY	6	136	4	0.999866	59.57	0	1298300	2302200	0	0	0
O60573	EIF4E2	Eukaryotic translation initiation factor 4E type 2	LLFQNLWKPR(1)LNVP	1	RLGPQRLLFQNLWKPRLNVP___________	10	241	3	1	99.5	130130000	133450000	0	0	0	13187000	Nat Commun 8:15571(2017);	Nat Commun 8:15571(2017);
O75306-2	NDUFS2	NADH dehydrogenase [ubiquinone] iron-sulfur protein 2, mitochondrial	KCDPHIGLLHR(1)GTEK	1	GEMVRKCDPHIGLLHRGTEKLIEYKTYLQAL	11	118	5	1	48.14	0	787310	0	0	3126500	3979100	J. Biol. Chem. 288:33016-33026(2013); Hum. Mol. Genet. 23:5159-5170(2014);
O75791-2	GRAP2	GRB2-related adapter protein 2	SQGGPHLSGAVGEEIR(0.087)PSMNR(0.913)	1	HLSGAVGEEIRPSMNRKLSDHPPTLPLQQHQ	21	71	4	0.913439	56.936	0	4339900	4760800	0	0	0
O94842-3	TOX4	TOX high mobility group box family member 4	VR(1)INLQQQPPPLQIK	1	PPPLQAMQQPPPQKVRINLQQQPPPLQIKSV	2	455	3	1	145.34	376810000	432960000	465370000	162060000	153420000	93737000	Mol. Cell. Proteomics 13:372-387(2014);Nat Commun 8:15571(2017);	Nat Commun 8:15571(2017);
O94913	PCF11	Pre-mRNA cleavage complex 2 protein Pcf11	FDGQPGQPSLLPR(1)FDGLHGQPGPR(0.867)FER(0.133)	2	ALRFDGQPGQPSLLPRFDGLHGQPGPRFERT	13	1051	5	0.999999	109.85	987620000	707860000	971360000	1466700000	1187400000	1310000000	Mol. Cell. Proteomics 13:372-387(2014);Nat Commun 8:15571(2017);	Nat Commun 8:15571(2017);
O94913	PCF11	Pre-mRNA cleavage complex 2 protein Pcf11	FDGQPGQPSLLPR(1)FDGLHGQPGPR(0.976)FER(0.024)	2	SLLPRFDGLHGQPGPRFERTPGQPGPQRFDG	24	1062	3	0.976254	109.85	14305000	21023000	44608000	110960000	56714000	71872000	Mol. Cell. Proteomics 13:372-387(2014);Nat Commun 8:15571(2017);	Nat Commun 8:15571(2017);
O94913	PCF11	Pre-mRNA cleavage complex 2 protein Pcf11	GQPVGGLR(1)FEGPHGQPVGGLR(0.847)FDNPR(0.153)	2	GLRFEGHRGQPVGGLRFEGPHGQPVGGLRFD	8	890	4	0.999999	84.181	4001400	0	0	53753000	16439000	28946000	Mol. Cell. Proteomics 13:372-387(2014);Nat Commun 8:15571(2017);	Nat Commun 8:15571(2017);
O94913	PCF11	Pre-mRNA cleavage complex 2 protein Pcf11	GQPVGGLR(1)FEGPHGQPVGGLR(0.957)FDNPR(0.043)	2	GLRFEGPHGQPVGGLRFDNPRGQPVGGLRFE	21	903	4	0.957295	84.181	4001400	0	0	53753000	16439000	28946000	Mol. Cell. Proteomics 13:372-387(2014);Nat Commun 8:15571(2017);	Nat Commun 8:15571(2017);
O95793-2	STAU1	Double-stranded RNA-binding protein Staufen homolog 1	GGAYPPR(1)YFYPFPVPPLLYQVELSVGGQQFNGK	1	QSTYNYNMRGGAYPPRYFYPFPVPPLLYQVE	7	34	4	1	187.26	0	9891200	733650000	136720000	15052000	24135000	Mol. Cell. Proteomics 13:372-387(2014)
P09651-2	HNRNPA1	Heterogeneous nuclear ribonucleoprotein A1;Heterogeneous nuclear ribonucleoprotein A1, N-terminally processed	SGSGNFGGGR(1)GGGFGGNDNFGR	1	SSQRGRSGSGNFGGGRGGGFGGNDNFGRGGN	10	206	3	0.999999	171.72	36894000	23283000	40412000	149500000	55744000	81341000	Nat. Methods 1:119-126(2004);Mol. Cell. Proteomics 13:372-387(2014);Nat Commun 8:15571(2017);
P09651-2	HNRNPA1;HNRNPA1L2	Heterogeneous nuclear ribonucleoprotein A1;Heterogeneous nuclear ribonucleoprotein A1, N-terminally processed;Heterogeneous nuclear ribonucleoprotein A1-like 2	QEMASASSSQR(0.999)GR(0.001)	1	KALSKQEMASASSSQRGRSGSGNFGGGRGGG	11	194	2	0.998588	109.11	12666000	17348000	14106000	83028000	9589100	19692000	Nat. Methods 1:119-126(2004);Mol. Cell. Proteomics 13:372-387(2014);Nat Commun 8:15571(2017);
P0CG12	CHTF8	Chromosome transmission fidelity protein 8 homolog isoform 2	TGALPGPGPLSNPR(1)LGGLPGPGPMSNPR(1)AGGLLGAGPDPR	1;2	PRTGALPGPGPLSNPRLGGLPGPGPMSNPRA	14	146	5	1	126.31	423870000	370590000	424100000	644090000	1168600000	330710000	Nat Commun 8:15571(2017);	Nat Commun 8:15571(2017);
P0CG12	CHTF8	Chromosome transmission fidelity protein 8 homolog isoform 2	AGGLLGTGSGLNLR(1)MAGPQGLDLAPILR	1	ARAGGLLGTGSGLNLRMAGPQGLDLAPILRA	14	266	3	1	179.36	245940000	210830000	499930000	528830000	226560000	448550000	Nat Commun 8:15571(2017);	Nat Commun 8:15571(2017);
P0CG12	CHTF8	Chromosome transmission fidelity protein 8 homolog isoform 2	SGFLGTNPAPR(1)SGVFPGPGLGPNPR(0.996)PSGLGPGPNLDAR(0.004)	1;2	PRSGVFPGPGLGPNPRPSGLGPGPNLDARAG	25	239	4	0.996256	126.64	0	4571100	25558000	64114000	50736000	27965000	Nat Commun 8:15571(2017);	Nat Commun 8:15571(2017);
P0CG12	CHTF8	Chromosome transmission fidelity protein 8 homolog isoform 2	MKEPR(0.999)IFPR(0.001)	1	___________MKEPRIFPRERPTPWTRAPL	5	5	3	0.999158	57.859	30756000	19780000	25843000	55878000	30152000	12704000	Nat Commun 8:15571(2017);	Nat Commun 8:15571(2017);
P0CG12	CHTF8	Chromosome transmission fidelity protein 8 homolog isoform 2	SGFLGTNPAPR(1)SGVFPGPGLGPNPR(0.996)PSGLGPGPNLDAR(0.004)	2	NPNLRSGFLGTNPAPRSGVFPGPGLGPNPRP	11	225	4	1	126.64	6840900	4571100	14657000	25180000	31620000	0	Nat Commun 8:15571(2017);	Nat Commun 8:15571(2017);
P0CG12	CHTF8	Chromosome transmission fidelity protein 8 homolog isoform 2	TGALPGPGPLSNPR(1)LGGLPGPGPMSNPR(1)AGGLLGAGPDPR	2	PRLGGLPGPGPMSNPRAGGLLGAGPDPRGGG	28	160	5	0.999948	104.31	409940000	357180000	0	0	1061400000	272930000	Nat Commun 8:15571(2017);	Nat Commun 8:15571(2017);
P10070-4	GLI2	Zinc finger protein GLI2	YAAATGGPPPTPLPGLER(0.865)MSLR(0.135)	1	AATGGPPPTPLPGLERMSLRTRLALLDAPER	18	565	3	0.864939	103.13	17717000	0	0	0	0	18501000
P11940	PABPC1	Polyadenylate-binding protein 1	VANTSTQTMGPR(1)PAAAAAAATPAVR	1	STQRVANTSTQTMGPRPAAAAAAATPAVRTV	12	493	3	0.999997	144.88	9517000	10691000	18080000	41600000	23443000	24489000	Mol. Cell. Proteomics 13:372-387(2014) ;EMBO Rep. 3:268-273(2002);Nat Commun 8:15571(2017);	Nat Commun 8:15571(2017);
P12270	TPR	Nucleoprotein TPR	QR(1)GVSHAMGGR(1)GGINR	2	TTLRQGVRGRQFNRQRGVSHAMGGRGGINRG	2	2345	5	1	65.092	36793000	19575000	38722000	120000000	252520000	24772000	Nat Commun 8:15571(2017);
P12270	TPR	Nucleoprotein TPR	QR(1)GVSHAMGGR(1)GGINR	2	RQFNRQRGVSHAMGGRGGINRGNIN______	11	2354	5	0.999864	65.092	36793000	19575000	38722000	120000000	252520000	24772000	Nat Commun 8:15571(2017);
P14678-2	SNRPB	Small nuclear ribonucleoprotein-associated proteins B and B'	AAGR(1)GIPAGVPMPQAPAGLAGPVR	1	LAGAAGGPGIGRAAGRGIPAGVPMPQAPAGL	4	112	3	0.999999	61.616	0	0	0	18110000	9791700	7660800	Mol. Cell. Proteomics 13:372-387(2014);Nat Commun 8:15571(2017);
P16989	YBX3	Y-box-binding protein 3	QFSGAR(1)NQLR	1	EGFDPPATDRQFSGARNQLRRPQYRPQYRQR	6	220	3	0.999877	68.846	19326000	23964000	40860000	127050000	530300000	83415000
P22626	HNRNPA2B1	Heterogeneous nuclear ribonucleoproteins A2/B1	SGR(1)GGNFGFGDSR	1	LSRQEMQEVQSSRSGRGGNFGFGDSRGGGGN	3	203	3	0.999989	49.423	4777400	4832500	5756200	10051000	4254500	5199800
P22626	HNRNPA2B1	Heterogeneous nuclear ribonucleoproteins A2/B1	GGNFGFGDSR(1)GGGGNFGPGPGSNFR	1	SSRSGRGGNFGFGDSRGGGGNFGPGPGSNFR	10	213	3	0.999994	78.975	2238400	0	4104500	0	2556200	5030400
P23246	SFPQ	Splicing factor, proline- and glutamine-rich	R(1)GGGGGR(1)GGLHDFR	2	DRFRSRGGGGGGFHRRGGGGGRGGLHDFRSP	1	19	4	1	96.745	7619000	5490500	15535000	216240000	155210000	13136000
P23246	SFPQ	Splicing factor, proline- and glutamine-rich	R(1)GGGGGR(1)GGLHDFR	2	GGGGGGFHRRGGGGGRGGLHDFRSPPPGMGL	7	25	4	1	96.745	7619000	5490500	15535000	216240000	155210000	13136000
P23769-2	GATA2	Endothelial transcription factor GATA-2	LTGGQMCR(1)PHLLHSPGLPWLDGGK	1	SYSPAHARLTGGQMCRPHLLHSPGLPWLDGG	8	86	3	1	124.35	31194000	28069000	90007000	0	0	0	Mol. Cell. Proteomics 13:372-387(2014)
P23771	GATA3	Trans-acting T-cell-specific transcription factor GATA-3	YPPTHHGSQVCR(1)PPLLHGSLPWLDGGK	1	TVQRYPPTHHGSQVCRPPLLHGSLPWLDGGK	12	86	5	1	43.162	0	0	4565800	0	0	0
P23786	CPT2	Carnitine O-palmitoyltransferase 2, mitochondrial	SIVPTMHYQDSLPR(1)LPIPK	1	QRSIVPTMHYQDSLPRLPIPKLEDTIRRYLS	14	51	4	1	75.463	36430000	36867000	35654000	79925000	13567000	18031000	Nat Commun 8:15571(2017);	Nat Commun 8:15571(2017);
P25940	COL5A3	Collagen alpha-3(V) chain	TGPMGAR(1)GPPGR(1)	2	PGPDGPPGRTGPMGARGPPGRVGPEGLRGIP	7	1348	3	1	40.589	0	2724300	4936300	0	4971200	2826600
P25940	COL5A3	Collagen alpha-3(V) chain	TGPMGAR(1)GPPGR(1)	2	PPGRTGPMGARGPPGRVGPEGLRGIPGPVGE	12	1353	3	1	40.589	0	2724300	4936300	0	4971200	2826600
P29590-13	PML	Protein PML	LHPQLHR(0.876)APIR(0.124)	1	AIRLRHALRLHPQLHRAPIRTWSPHVVQAST	7	632	4	0.876403	60.434	0	0	0	2675800	6805700	1056400	Nat Commun 8:15571(2017);
P33240-2	CSTF2	Cleavage stimulation factor subunit 2	GPVPGPR(1)GPIPSGMQGPSPINMGAVVPQGSR	1	MEARGMDTRGPVPGPRGPIPSGMQGPSPINM	7	458	3	1	90.062	0	0	0	0	6607000	0
P48634-3	PRRC2A	Protein PRRC2A	VAGPR(0.999)GSGPPMR(0.823)LVEPVGR(0.178)	2	PTPDGPSRFPRVAGPRGSGPPMRLVEPVGRP	5	289	4	0.99875	48.547	0	0	0	10340000	13500000	2143700	Mol. Cell. Proteomics 13:372-387(2014)
P48634-3	PRRC2A	Protein PRRC2A	GSGPPMR(1)LVEPVGRPSILK	1;2	RFPRVAGPRGSGPPMRLVEPVGRPSILKEDN	7	296	3	0.999993	91.355	13144000	5347500	5933900	56815000	34760000	40166000	Mol. Cell. Proteomics 13:372-387(2014)
P49750-3	YLPM1	YLP motif-containing protein 1	SSYLESPR(1)GPR(0.998)FDGPR(0.002)	2	GLLPDPPRSSYLESPRGPRFDGPRRFEDLGS	8	563	3	0.999737	71.879	1445200000	1371200000	1670300000	1007100000	459160000	445980000	Nat Commun 8:15571(2017);	Nat Commun 8:15571(2017);
P49750-3	YLPM1	YLP motif-containing protein 1	SSYLESPR(1)GPR(0.998)FDGPR(0.002)	2	PDPPRSSYLESPRGPRFDGPRRFEDLGSRCE	11	566	3	0.998331	71.879	1445200000	1371200000	1670300000	1007100000	459160000	445980000	Nat Commun 8:15571(2017);	Nat Commun 8:15571(2017);
P51692	STAT5B;STAT5A	Signal transducer and activator of transcription 5B;Signal transducer and activator of transcription 5A	CIR(1)HILYNEQR	1	QNTYDRCPMELVRCIRHILYNEQRLVREANN	3	110	3	1	67.022	0	0	7000200	3114100	4300900	3909800
P55265	ADAR	Double-stranded RNA-specific adenosine deaminase	QLR(1)YQQPGPGSSPSSFLLK	1	GYYTHPFQGYEHRQLRYQQPGPGSSPSSFLL	3	26	2	1	153.63	3492900	5004300	7435100	35897000	5870600	7133100	Mol. Cell. Proteomics 13:372-387(2014);Nat Commun 8:15571(2017);	Nat Commun 8:15571(2017);
P55345-6	PRMT2	Protein arginine N-methyltransferase 2	ILILR(1)QTTADWWWGER(1)AGCCGYIPANHVGK	2	ETQLSFLRGEKILILRQTTADWWWGERAGCC	5	61	5	1	86.006	17980000	17573000	30770000	0	0	8367700	Mol. Cell. Proteomics 13:372-387(2014)
P55345-6	PRMT2	Protein arginine N-methyltransferase 2	ILILR(1)QTTADWWWGER(1)AGCCGYIPANHVGK	2	ILILRQTTADWWWGERAGCCGYIPANHVGKH	16	72	5	1	86.006	17980000	17573000	30770000	0	0	8367700	Mol. Cell. Proteomics 13:372-387(2014)
P56545	CTBP2	C-terminal-binding protein 2	ICEGIR(1)PQIMNGPLHPR	1	HKVKRQRLDRICEGIRPQIMNGPLHPRPLVA	6	22	3	1	162.85	35708000	23333000	33273000	157370000	24542000	23184000	Mol. Cell. Proteomics 13:372-387(2014) ;Nat Commun 8:15571(2017);	Nat Commun 8:15571(2017);
P57053	HIST1H2BL;HIST1H2BM;HIST1H2BN;HIST1H2BH;HIST2H2BF;HIST1H2BC;HIST1H2BD;HIST1H2BK;HIST2H2BE;HIST1H2BB;HIST1H2BO;HIST1H2BJ;HIST3H2BB;H2BFS	Histone H2B type 1-L;Histone H2B type 1-M;Histone H2B type 1-N;Histone H2B type 1-H;Histone H2B type 2-F;Histone H2B type 1-C/E/F/G/I;Histone H2B type 1-D;Histone H2B type 1-K;Histone H2B type 2-E;Histone H2B type 1-B;Histone H2B type 1-O;Histone H2B type 1-J;Histone H2B type 3-B;Histone H2B type F-S	AMGIMNSFVNDIFER(1)	1	KAMGIMNSFVNDIFERIAGEASRLAHYNKRS;KAMGIMNSFVNDIFERIAGEASRLPHYNKRS;KAMGIMNSFVNDIFERIASEASRLAHYNKRS	15	73	2	1	147.2	0	0	0	37085000	0	0
P62805	HIST1H4A	Histone H4	ISGLIYEETR(1)		RGGVKRISGLIYEETRGVLKVFLENVIRDAV	10	56	2	1	62.659	0	0	0	62298000	0	0	Curr. Biol. 11:996-1000(2001);Science 293:853-857(2001) ;Science 306:279-283(2004)
P62995-3	TRA2B	Transformer-2 protein homolog beta	SYR(1)GGGGGGGGWR	1	YDRGYDDRDYYSRSYRGGGGGGGGWRAAQDR	3	141	3	0.999998	72.496	8262000	7211600	9318900	0	40710000	5478800	Mol. Cell. Proteomics 13:372-387(2014) ;Nat Commun 8:15571(2017);
P63162	SNRPN	Small nuclear ribonucleoprotein-associated protein N	VPLAGAAGGPGVGR(1)	1	ARVPLAGAAGGPGVGRAAGRGVPAGVPIPQA	14	108	2	1	80.755	0	0	0	0	1130700	2463600
P68104	EEF1A1;EEF1A1P5	Elongation factor 1-alpha 1;Putative elongation factor 1-alpha-like 3	QLIVGVNKMDSTEPPYSQKR(1)	1	GVNKMDSTEPPYSQKRYEEIVKEVSTYIKKI	20	166	4	1	104.52	4742100	5481100	5319500	26291000	9666500	20292000
P78345	RPP38	Ribonuclease P protein subunit p38	AAAPQAPGR(1)GSLR	1	______MAAAPQAPGRGSLRKTRPLVVKTSL	9	10	2	0.999504	76.221	9052300	6074700	9344800	37194000	111820000	17237000
P81877-2			AFHDYPFMSPR(0.943)YPGGPR(0.508)PPLR(0.549)	2	SSEAKAFHDYPFMSPRYPGGPRPPLRIPNQA	11	100	5	0.943185	49.224	0	0	0	0	5039100	2098700
P98179	RBM3	RNA-binding protein 3	SYSR(1)GGGDQGYGSGR	1	RGGGFGAHGRGRSYSRGGGDQGYGSGRYYDS	4	105	2	1	150.61	300640000	250720000	247860000	3046200000	893280000	1396600000	Nat Commun 8:15571(2017);
Q00839-2	HNRNPU	Heterogeneous nuclear ribonucleoprotein U	R(1)GNMPQR(1)GGGGGGSGGIGYPYPR	2	NFRGGAPGNRGGYNRRGNMPQRGGGGGGSGG	1	714	4	1	81.016	0	0	0	37547000	90175000	0	Mol. Cell. Proteomics 13:372-387(2014);Nat Commun 8:15571(2017);
Q00839-2	HNRNPU	Heterogeneous nuclear ribonucleoprotein U	R(1)GNMPQR(1)GGGGGGSGGIGYPYPR	2	PGNRGGYNRRGNMPQRGGGGGGSGGIGYPYP	7	720	4	1	81.016	0	0	0	37547000	90175000	0	Mol. Cell. Proteomics 13:372-387(2014);Nat Commun 8:15571(2017);
Q00839-2	HNRNPU	Heterogeneous nuclear ribonucleoprotein U	APVFPGR(1)GSYSNR(1)	2	GGIGYPYPRAPVFPGRGSYSNRGNYNRGGMP	7	743	3	1	69.451	6155200	8393300	0	41527000	41356000	12790000	Mol. Cell. Proteomics 13:372-387(2014)
Q00839-2	HNRNPU	Heterogeneous nuclear ribonucleoprotein U	APVFPGR(1)GSYSNR(1)	2	YPRAPVFPGRGSYSNRGNYNRGGMPNRGNYN	13	749	3	1	69.451	6155200	8393300	0	41527000	41356000	12790000	Mol. Cell. Proteomics 13:372-387(2014)
Q01196-7	RUNX1	Runt-related transcription factor 1	VSPHHPAPTPNPR(1)ASLNHSTAFNPQPQSQMQDTR	1	AMRVSPHHPAPTPNPRASLNHSTAFNPQPQS	13	190	4	1	155.95	1100000000	816530000	1060000000	93887000	56485000	57901000
Q01844-2	EWSR1	RNA-binding protein EWS	R(1)GGPGGPPGPLMEQMGGR	1	RGGRGMDRGGFGGGRRGGPGGPPGPLMEQMG	1	542	3	1	143.97	25138000	17674000	39106000	186990000	51909000	80140000	J. Biol. Chem. 276:18681-18687(2001);Proteins 72:1125-1137(2008)
Q01844-2	EWSR1	RNA-binding protein EWS	GMPPPLR(1)GGPGGPGGPGGPMGR	1	GGLPPREGRGMPPPLRGGPGGPGGPGGPMGR	7	398	3	0.999998	72.21	0	3896900	0	19903000	12568000	3784700	J. Biol. Chem. 276:18681-18687(2001);Proteins 72:1125-1137(2008)
Q02080	MEF2B	Myocyte-specific enhancer factor 2B	SDLPGGLAGPR(0.869)GGLNTSR(0.131)	1	TEGRRSDLPGGLAGPRGGLNTSRSLYSGLQN	11	219	3	0.869067	60.474	11889000	10047000	14381000	0	0	1362300
Q02779	MAP3K10	Mitogen-activated protein kinase kinase kinase 10	DLLDFPR(1)LPDPQALFPAR	1	PAGHGPGPRDLLDFPRLPDPQALFPARRRPP	7	857	3	1	158.81	48077000	22210000	45963000	53723000	93297000	117690000
Q04637-3	EIF4G1	Eukaryotic translation initiation factor 4 gamma 1	MNTPSQPR(1)QHFYPSR	1;2	________MNTPSQPRQHFYPSRAQPPSSAA	8	8	2	1	137.98	24208000	25254000	39370000	183330000	112230000	37660000
Q04726-2	TLE3	Transducin-like enhancer protein 3	MYPQGR(1)HPAPHQPGQPGFK	1	__________MYPQGRHPAPHQPGQPGFKFT	6	6	4	1	65.652	0	0	5799000	31361000	9118900	7499900
Q05639	EEF1A2	Elongation factor 1-alpha 2	MDSTEPAYSEKR(1)	1	GVNKMDSTEPAYSEKRYDEIVKEVSAYIKKI	12	166	3	1	91.855	2763200	3823100	4635200	0	2228700	3322500
Q07666-2	KHDRBS1	KH domain-containing, RNA-binding, signal transduction-associated protein 1	GVPVR(1)GR(1)GAAPPPPPVPR(1)	3	LNGVPEPSRGRGVPVRGRGAAPPPPPVPRGR	5	264	4	1	42.647	0	0	0	0	5444800	0	Mol. Biol. Cell 14:274-287(2003) ;Nat Commun 8:15571(2017);
Q07666-2	KHDRBS1	KH domain-containing, RNA-binding, signal transduction-associated protein 1	GVPVR(1)GR(1)GAAPPPPPVPR(1)	3	GVPEPSRGRGVPVRGRGAAPPPPPVPRGRGV	7	266	4	1	42.647	0	0	0	0	5444800	0	Mol. Biol. Cell 14:274-287(2003)
Q07666-2	KHDRBS1	KH domain-containing, RNA-binding, signal transduction-associated protein 1	GVPVR(1)GR(1)GAAPPPPPVPR(1)	3	PVRGRGAAPPPPPVPRGRGVGPPRGALVRGT	18	277	4	1	42.647	0	0	0	0	5444800	0	Mol. Biol. Cell 14:274-287(2003)
Q07666-2	KHDRBS1	KH domain-containing, RNA-binding, signal transduction-associated protein 1	GTPVR(1)GAITR	1	GVGPPRGALVRGTPVRGAITRGATVTRGVPP	5	295	3	0.999733	72.928	17608000	18876000	30257000	45190000	266190000	36485000	Mol. Biol. Cell 14:274-287(2003)
Q07890-2	SOS2	Son of sevenless homolog 2	ELSHPPLYR(1)LPLLENAETPQ	1	PPKTYKRELSHPPLYRLPLLENAETPQ____	9	1288	3	1	59.872	24682000	0	12614000	0	0	0	Nat Commun 8:15571(2017);	Nat Commun 8:15571(2017);
Q08211	DHX9	ATP-dependent RNA helicase A	MAR(1)YDNGSGYR	1	GSTRYGDGPRPPKMARYDNGSGYRRGGSSYS	3	1166	3	0.999872	47.894	0	0	4096000	0	4827800	5364400
Q12840	KIF5A	Kinesin heavy chain isoform 5A	SYVPYR(1)DSK		VISALAEGTKSYVPYRDSKMTRILQDSLGGN	6	280	3	1	62.464	3083300	3238600	4324600	29726000	11617000	15416000
Q12857-2	NFIA	Nuclear factor 1 A-type	ASPHATPSTLHFPTSPIIQQPGPYFSHPAIR(1)YHPQETLK	1	PIIQQPGPYFSHPAIRYHPQETLKEFVQLVC	31	389	5	1	63.776	0	5675200	13503000	0	0	5699300
Q12906	ILF3	Interleukin enhancer-binding factor 3	FAAKPHNPGFGMGGPMHNEVPPPPNLR(1)GR(1)	2	MGGPMHNEVPPPPNLRGRGRGGSIRGRGRGR	27	640	5	1	54.521	0	0	0	11931000	0	0	Nat Commun 8:15571(2017);
Q12906	ILF3	Interleukin enhancer-binding factor 3	FAAKPHNPGFGMGGPMHNEVPPPPNLR(1)GR(1)	2	GPMHNEVPPPPNLRGRGRGGSIRGRGRGRGF	29	642	5	1	54.521	0	0	0	11931000	0	0	Nat Commun 8:15571(2017);
Q12906	ILF3	Interleukin enhancer-binding factor 3	APVPVR(1)GGPK	1	LALDANKKKRAPVPVRGGPKFAAKPHNPGFG	6	609	3	1	57.032	13143000	8834800	21366000	60244000	56554000	46114000	Nat Commun 8:15571(2017);
Q13151	HNRNPA0	Heterogeneous nuclear ribonucleoprotein A0	SNSGPYR(1)GGYGGGGGYGGSSF	1	GGGSSWGGRSNSGPYRGGYGGGGGYGGSSF_	7	291	2	1	133.05	8011000	4355300	4770700	20821000	13980000	25051000	Mol. Cell. Proteomics 13:372-387(2014) ;Nat Commun 8:15571(2017);
Q13227	GPS2	G protein pathway suppressor 2	SGFAATSQPGPR(1)LPFIQHSQNPR(1)FYHK	1;2	PAGKSGFAATSQPGPRLPFIQHSQNPRFYHK	12	312	4	1	144.66	42954000	28306000	47811000	246860000	415540000	82788000	FASEB J. 24:937-946(2010);Mol. Cell. Proteomics 13:372-387(2014) ;Nat Commun 8:15571(2017);	Nat Commun 8:15571(2017);
Q13227	GPS2	G protein pathway suppressor 2	SGFAATSQPGPR(1)LPFIQHSQNPR(1)FYHK	2	QPGPRLPFIQHSQNPRFYHK___________	23	323	4	1	120.52	28607000	16845000	34416000	107370000	247860000	27736000	FASEB J. 24:937-946(2010);Mol. Cell. Proteomics 13:372-387(2014) ;Nat Commun 8:15571(2017);	Nat Commun 8:15571(2017);
Q13243	SRSF5	Serine/arginine-rich splicing factor 5	VTIEHAR(0.873)AR(0.127)	1	DGKELCSERVTIEHARARSRGGRGRGRYSDR	7	73	3	0.873428	49.418	32412000	0	0	0	0	0
Q13283	G3BP1	Ras GTPase-activating protein-binding protein 1	GPGGPR(1)GGLGGGMR	1	EGDRRDNRLRGPGGPRGGLGGGMRGPPRGGM	6	435	2	1	107.09	42603000	35678000	40662000	136810000	629180000	55794000	Mol. Cell. Proteomics 13:372-387(2014) ;Nat Commun 8:15571(2017);
Q13303	KCNAB2	Voltage-gated potassium channel subunit beta-2	QTGSPGMIYSTR(1)YGSPK	1	LSLRQTGSPGMIYSTRYGSPKRQLQFYRNLG	12	28	3	1	78.285	61496000	31935000	35048000	63261000	41289000	66663000	Mol. Cell. Proteomics 13:372-387(2014);Nat Commun 8:15571(2017);	Nat Commun 8:15571(2017);
Q13310-2	PABPC4	Polyadenylate-binding protein 4	VGVPTAVQNLAPR(1)AAVAAAAPR(1)AVAPYK	1;2	VQNLAPRAAVAAAAPRAVAPYKYASSVRSPH	22	505	3	1	70.1	0	0	0	9262900	1987200	4442700
Q13435	SF3B2	Splicing factor 3B subunit 2	MGTPVPRPPQDMGQIGVR(0.999)TPLGPR(0.001)	1	TPVPRPPQDMGQIGVRTPLGPRVAAPVGPVG	18	216	4	0.998614	90.718	81515000	169390000	193800000	8586100	336010000	0	Nat Commun 8:15571(2017);	Nat Commun 8:15571(2017);
Q13950-3	RUNX2	Runt-related transcription factor 2	VGVPPQNPR(1)PSLNSAPSPFNPQGQSQITDPR	1	IPHPSMRVGVPPQNPRPSLNSAPSPFNPQGQ	9	267	3	1	121.1	55224000	66697000	73223000	105330000	46588000	50709000	Nat Commun 8:15571(2017);	Nat Commun 8:15571(2017);
Q14103-3	HNRNPD	Heterogeneous nuclear ribonucleoprotein D0	R(1)GGHQNSYKPY	1	GRGGDQQSGYGKVSRRGGHQNSYKPY_____	1	296	2	1	105.86	83708000	24051000	87723000	593200000	33290000	32572000
Q14151	SAFB2	Scaffold attachment factor B2	GGVAGR(1)GGFAQGGHSQGHVVPGGGLEGGGVASQDR	1;2	PSGPGHMASRGGVAGRGGFAQGGHSQGHVVP	6	903	4	1	83.26	0	0	0	23296000	0	0
Q14151	SAFB2	Scaffold attachment factor B2	GLSGPSGPGHMASR(1)GGVAGR(1)GGFAQGGHSQGHVVPGGGLEGGGVASQDR	2	ERGLSGPSGPGHMASRGGVAGRGGFAQGGHS	14	897	5	0.999943	60.959	0	0	0	11656000	0	0
Q14444-2	CAPRIN1	Caprin-1	GAR(1)GLMNGYR	1	YYNSRGVSRGGSRGARGLMNGYRGPANGFRG	3	619	3	0.999994	54.982	5405400	4980700	0	7780100	10501000	0	Mol. Cell. Proteomics 13:372-387(2014) ;Nat Commun 8:15571(2017);
Q14527	HLTF	Helicase-like transcription factor	YLQTVQYGVHGNFPR(1)LSYPTFFPR	1	KYLQTVQYGVHGNFPRLSYPTFFPRFEFQDV	15	27	4	0.999542	178.77	256300000	255780000	461740000	240320000	337930000	345350000	Nat Commun 8:15571(2017);	Nat Commun 8:15571(2017);
Q14527	HLTF	Helicase-like transcription factor	YLQTVQYGVHGNFPR(0.19)LSYPTFFPR(0.81)	1	VHGNFPRLSYPTFFPRFEFQDVIPPDDFLTS	24	36	3	0.809743	154.19	0	46967000	0	0	54062000	57621000	Nat Commun 8:15571(2017);	Nat Commun 8:15571(2017);
Q14686	NCOA6	Nuclear receptor coactivator 6	SVR(1)LPVSQNVHPPR(0.998)GPLNPDSQR(0.002)	1;2	PKSVRLPVSQNVHPPRGPLNPDSQRMPMQQS	14	1058	4	0.997657	129.46	32663000	30593000	46889000	78084000	41834000	28390000	Mol. Cell. Proteomics 13:372-387(2014)
Q14686	NCOA6	Nuclear receptor coactivator 6	SVR(1)LPVSQNVHPPR(0.998)GPLNPDSQR(0.002)	2	QMMMMLMMQQDPKSVRLPVSQNVHPPRGPLN	3	1047	4	1	129.46	15505000	12266000	25429000	16568000	20673000	4915300	Mol. Cell. Proteomics 13:372-387(2014)
Q14686	NCOA6	Nuclear receptor coactivator 6	GPLNPDSQR(1)MPMQQSGSVPVMVSLQGPASVPPSPDK	1	QNVHPPRGPLNPDSQRMPMQQSGSVPVMVSL	9	1067	4	1	119.75	13575000	13164000	17435000	0	5805100	4732600	Mol. Cell. Proteomics 13:372-387(2014)
Q15032-2	R3HDM1	R3H domain-containing protein 1	PFVPGQGDSR(1)YPLLGQPLQYNPPAVLHGHIPNQQGQPGSR	1	MPQFSRPFVPGQGDSRYPLLGQPLQYNPPAV	10	801	5	1	136.48	347240000	275540000	333880000	814680000	388990000	635140000	Mol. Cell. Proteomics 13:372-387(2014)
Q15406-3	NR6A1	Nuclear receptor subfamily 6 group A member 1	TCLICGDR(1)	1	TNDRAEQRTCLICGDRATGLHYGIISCEGCK	8	40	2	1	101.33	10196000	7011900	14832000	13550000	7546600	8632600
Q15596	NCOA2	Nuclear receptor coactivator 2	QR(1)EILNQHLR	1	PTQAPINAQMLAQRQREILNQHLRQRQMHQQ	2	1240	3	1	89.08	8457000	9228800	9724100	8982500	1972300	2505300	Mol. Cell. Proteomics 13:372-387(2014)
Q15735	INPP5J	Phosphatidylinositol 4,5-bisphosphate 5-phosphatase A	NAALGPSEPR(1)LALAPVGPR	1;2	QLPAKKNAALGPSEPRLALAPVGPRAAMSAS	10	56	3	0.999989	134.14	126000000	126360000	165400000	0	0	0	Nat Commun 8:15571(2017);	Nat Commun 8:15571(2017);
Q15735	INPP5J	Phosphatidylinositol 4,5-bisphosphate 5-phosphatase A	LALAPVGPR(1)AAMSASSEGPR	1;2	LGPSEPRLALAPVGPRAAMSASSEGPRLALA	9	65	3	0.999987	124.92	59002000	66736000	80419000	0	0	0	Nat Commun 8:15571(2017);	Nat Commun 8:15571(2017);
Q15735	INPP5J	Phosphatidylinositol 4,5-bisphosphate 5-phosphatase A	AAMSASSEGPR(1)LALASPR(1)PILAPLCTPEGQK	1;2	PVGPRAAMSASSEGPRLALASPRPILAPLCT	11	76	3	1	109.97	18149000	15783000	20147000	0	0	0	Nat Commun 8:15571(2017);	Nat Commun 8:15571(2017);
Q15735	INPP5J	Phosphatidylinositol 4,5-bisphosphate 5-phosphatase A	AAMSASSEGPR(1)LALASPR(1)PILAPLCTPEGQK	1;2	MSASSEGPRLALASPRPILAPLCTPEGQKTA	18	83	3	1	105.03	18149000	8993900	20147000	0	0	0	Nat Commun 8:15571(2017);	Nat Commun 8:15571(2017);
Q15788-2	NCOA1	Nuclear receptor coactivator 1	LQLQQR(1)LQGQQQLIHQNR	1	RPPAAPNQLRLQLQQRLQGQQQLIHQNRQAI	6	1061	4	0.999732	52.026	0	0	0	0	2436700	0
Q15788-2	NCOA1	Nuclear receptor coactivator 1	QLIQQQR(0.999)AMLMR(0.001)	1	LYSQQHRQRQLIQQQRAMLMRQQSFGNNLPP	7	1131	3	0.999139	78.653	2841300	3334500	0	9067900	0	6085300
Q16587-5			SR(1)GGTLAGHTQERPGH	1	GIPPQVSPLRPATRSRGGTLAGHTQERPGH_	2	164	3	1	94.09	48650000	33524000	37386000	0	40062000	44543000
Q1KMD3	HNRNPUL2	Heterogeneous nuclear ribonucleoprotein U-like protein 2	AYGQQYWGQPGNR(0.979)GGYR(0.021)	1	DNRAYGQQYWGQPGNRGGYRNFYDRYRGDYD	13	684	3	0.979062	134.61	15718000	3061400	0	13072000	0	4084500	Nat Commun 8:15571(2017);
Q2KHM9	KIAA0753	Uncharacterized protein KIAA0753	MGPGQPASTCVHLAPR(0.871)TQLDGR(0.129)	1	MGPGQPASTCVHLAPRTQLDGRSDPKVLQTQ	16	16	4	0.870732	78.021	2090800	3327500	3108400	0	0	0
Q5BKZ1	ZNF326	DBIRD complex subunit ZNF326	STNVTVAAAR(1)GIK	1	VDYQNKSTNVTVAAARGIKRKMMQPFNKPSG	10	235	3	1	59.57	5154600	4604600	6312400	6449400	4011000	0
Q5CZ79-2	ANKRD20A8P	Ankyrin repeat domain-containing protein 20B	SLALETVQNDLR(1)K		LRKKSLALETVQNDLRKTQQQTQEMKEMYQN	12	272	2	1	50.607	4776600	3604100	8504800	13153000	6684000	6636400
Q5H9F3-2	BCORL1	BCL-6 corepressor-like protein 1	ELSLWKPTGPANIYPR(1)CSVNGK	1	ELSLWKPTGPANIYPRCSVNGKPTSTQVLPV	16	816	4	1	78.021	4807500	0	3266700	0	3560300	2251000
Q5JRA6-4	MIA3	Melanoma inhibitory activity protein 3	EYFIPGTR(1)LPPPTHGPQEYPPPPAVR	1	PLGSLGPREYFIPGTRLPPPTHGPQEYPPPP	8	737	3	1	174.2	49200000	42846000	87809000	343520000	144530000	228470000	Nat Commun 8:15571(2017);	Nat Commun 8:15571(2017);
Q5PRF9	SAMD4B	Protein Smaug homolog 2	MGLLSPSGIGGVSPR(1)HALTSPSLGGQGR	1	RMGLLSPSGIGGVSPRHALTSPSLGGQGRQN	15	602	2	1	152.81	266960000	235270000	314430000	5008300000	3991600000	1138000000	Mol. Cell. Proteomics 13:372-387(2014);Nat Commun 8:15571(2017);
Q5T0Z8	C6orf132	Uncharacterized protein C6orf132	YAGAGGLER(1)FSGGGR(1)SLIK	2	RFPAGARYAGAGGLERFSGGGRSLIKKRLYV	9	1053	4	1	58.246	16670000	14165000	22433000	0	0	0	Mol. Cell. Proteomics 13:372-387(2014);Nat Commun 8:15571(2017);	Nat Commun 8:15571(2017);
Q5T0Z8	C6orf132	Uncharacterized protein C6orf132	YAGAGGLER(1)FSGGGR(1)SLIK	2	RYAGAGGLERFSGGGRSLIKKRLYVGEPHRG	15	1059	4	1	58.246	16670000	14165000	22433000	0	0	0	Mol. Cell. Proteomics 13:372-387(2014);Nat Commun 8:15571(2017);	Nat Commun 8:15571(2017);
Q5T0Z8	C6orf132	Uncharacterized protein C6orf132	APPGGLHAPR(1)LSLEGAAR(1)GAAEAK	1;2	VNSAGRAPPGGLHAPRLSLEGAARGAAEAKH	10	1119	5	1	102.65	584370000	590240000	1026900000	13484000	27834000	15279000	Mol. Cell. Proteomics 13:372-387(2014);Nat Commun 8:15571(2017);	Nat Commun 8:15571(2017);
Q5T0Z8	C6orf132	Uncharacterized protein C6orf132	APPGGLHAPR(1)LSLEGAAR(1)GAAEAK	1;2	PGGLHAPRLSLEGAARGAAEAKHKAPGSADY	18	1127	5	1	99.481	1612200000	304070000	526410000	0	39832000	36620000	Mol. Cell. Proteomics 13:372-387(2014)
Q5T0Z8	C6orf132	Uncharacterized protein C6orf132	FPAGAR(1)YAGAGGLER	1	GAPPALGFSRFPAGARYAGAGGLERFSGGGR	6	1044	3	0.999999	91.62	137870000	134320000	138020000	0	5634400	6460300	Mol. Cell. Proteomics 13:372-387(2014)
Q5T1M5-2	FKBP15	FK506-binding protein 15	QHNTEIR(1)MAVSK	1	ASFLMTEARQHNTEIRMAVSKVADKMDHLMT	7	520	3	1	64.439	13700000	12898000	12516000	0	0	3153500
Q5T1R4-2	HIVEP3	Transcription factor HIVEP3	ELAPR(1)AHVLSK	1	LSPLTLCPLGRELAPRAHVLSKLEGTTDPGL	5	2048	3	1	45.158	29215000	0	40841000	0	0	0	Nat Commun 8:15571(2017);	Nat Commun 8:15571(2017);
Q5VST9	OBSCN	Obscurin	SLMSYKSILVMR(1)	1	RWQRSLMSYKSILVMRSIPELLRGPPDSPSL	12	6761	3	1	41.283	0	5048900	7517200	9617300	2410400	0
Q5VT52-2	RPRD2	Regulation of nuclear pre-mRNA domain-containing protein 2	PR(1)EPFLSR(1)DPFHSLK	1;2	RSPRPDFRPREPFLSRDPFHSLKRPRPPFAR	8	1393	4	1	126.95	382330000	268980000	346660000	1667600000	791390000	1160800000	Mol. Cell. Proteomics 13:372-387(2014);Nat Commun 8:15571(2017);	Nat Commun 8:15571(2017);
Q5VT52-2	RPRD2	Regulation of nuclear pre-mRNA domain-containing protein 2	PR(1)EPFLSR(1)DPFHSLK	2	RSGIILRSPRPDFRPREPFLSRDPFHSLKRP	2	1387	4	1	126.95	378890000	265570000	346660000	1607900000	771010000	1130100000	Mol. Cell. Proteomics 13:372-387(2014);Nat Commun 8:15571(2017);	Nat Commun 8:15571(2017);
Q5VT52-2	RPRD2	Regulation of nuclear pre-mRNA domain-containing protein 2	VR(1)ESLTLPSHSLEHLGPPHGGGGGGGSNSSSGPPLGPSHR	1	GPTQRDLNGPGLSRVRESLTLPSHSLEHLGP	2	1329	4	1	201.01	351220000	226760000	600350000	268270000	142510000	142330000	Mol. Cell. Proteomics 13:372-387(2014)
Q63HQ2-5	EGFLAM	Pikachurin	DGLLLWR(1)GDSPMR(1)	2	_MRFKTTAKDGLLLWRGDSPMRPNSDFISLG	7	15	2	1	50.909	10276000	13263000	14253000	0	0	0
Q63HQ2-5	EGFLAM	Pikachurin	DGLLLWR(1)GDSPMR(1)	2	TAKDGLLLWRGDSPMRPNSDFISLGLRDGAL	13	21	2	1	50.909	10276000	13263000	14253000	0	0	0
Q68CZ2-2	TNS3	Tensin-3	CPADNPGLVQAQPR(0.995)VPLTPTR(0.005)	1	SRCPADNPGLVQAQPRVPLTPTRGTSSRVAV	14	388	3	0.994866	152.68	0	56189000	67425000	28392000	13691000	14579000	Nat Commun 8:15571(2017);	Nat Commun 8:15571(2017);
Q6N021	TET2	Methylcytosine dioxygenase TET2	LSLPPIHTLYQPR(1)FGNSQSFTSK	1	LSKLSLPPIHTLYQPRFGNSQSFTSKYLGYG	13	1682	4	1	54.658	0	0	0	23347000	0	0	Mol. Cell. Proteomics 13:372-387(2014);Nat Commun 8:15571(2017);	Nat Commun 8:15571(2017);
Q6NXT4-4	SLC30A6	Zinc transporter 6	TGFTNIPSR(0.995)YGTNNR(0.005)	1	GATQGLRTGFTNIPSRYGTNNRIGQPRP___	9	420	3	0.994508	131.69	10965000	8484000	11911000	14265000	25190000	0	Nat Commun 8:15571(2017);	Nat Commun 8:15571(2017);
Q6PJG9	LRFN4	Leucine-rich repeat and fibronectin type-III domain-containing protein 4	SLHLDGNR(1)	1	FGDLESLRSLHLDGNRLVELGTGSLRGPVNL	8	107	3	1	64.803	2116200	1538500	2622400	5064600	3176600	4676000
Q6PJT7-10	ZC3H14	Zinc finger CCCH domain-containing protein 14	FNTQCTR(0.002)PDCTFYHPTINVPPR(0.998)HALK	1	RPDCTFYHPTINVPPRHALKWIRPQTSE___	22	531	5	0.998482	59.356	17076000	14097000	26439000	11245000	0	4575900
Q6PKG0-3	LARP1	La-related protein 1	SDGAGGAR(0.997)ASFR(0.003)	1	QDETSSVKSDGAGGARASFRGRGRGRGRGRG	8	257	3	0.996897	82.417	18151000	16020000	24188000	72760000	40790000	46326000
Q6UWL6-5	KIRREL2	Kin of IRRE-like protein 2	AR(1)AGYLTTPHPR	1	NPHLGMVPPCRLYRARAGYLTTPHPRAFTSY	2	169	3	0.999999	61.435	2042900	2222200	4362800	21073000	14879000	6917200
Q6ZUT1	C11orf57	Uncharacterized protein C11orf57	SR(1)IPLGK	1	_____________MSRIPLGKVLLRNVIRHT	2	3	2	1	69.383	12769000	11705000	10880000	25047000	20780000	14728000
Q75N03-2	CBLL1	E3 ubiquitin-protein ligase Hakai	GPPPPPR(1)LQGPPSQTPLPGPHHPDQTR	1	SPGIWPAPRGPPPPPRLQGPPSQTPLPGPHH	7	464	5	0.999987	67.413	14906000	4487700	17558000	63848000	0	37845000
Q75N03-2	CBLL1	E3 ubiquitin-protein ligase Hakai	LQGPPSQTPLPGPHHPDQTR(1)YR(1)PYYQ	2	PSQTPLPGPHHPDQTRYRPYYQ_________	20	484	4	1	77.287	5094200	0	7725200	0	16180000	20415000
Q75N03-2	CBLL1	E3 ubiquitin-protein ligase Hakai	LQGPPSQTPLPGPHHPDQTR(1)YR(1)PYYQ	2	QTPLPGPHHPDQTRYRPYYQ___________	22	486	4	1	77.287	5094200	0	7725200	0	16180000	20415000
Q7Z591-6	AKNA	AT-hook-containing transcription factor	YGR(1)GQLNYPLPDFSK	1	ATLAGRSSSNAPKYGRGQLNYPLPDFSKVGP	3	351	3	1	47.774	0	10499000	11723000	0	0	0
Q7Z5L9-2	IRF2BP2	Interferon regulatory factor 2-binding protein 2	APQALER(1)YPLAAAAERPPR	1	HGGPEAAPRAPQALERYPLAAAAERPPRLGS	7	116	4	1	146.16	39589000	45232000	66103000	0	16027000	16245000
Q86TB9-2	PATL1	Protein PAT1 homolog 1	PVHVR(0.997)PPMPPR(0.082)YPAPYGER(0.921)	2	VRPPMPPRYPAPYGERMSPNQLCSVPNSSLL	19	88	4	0.920886	67.605	0	0	0	54065000	0	0	Mol. Cell. Proteomics 13:372-387(2014);Nat Commun 8:15571(2017);	Nat Commun 8:15571(2017);
Q86TB9-2	PATL1	Protein PAT1 homolog 1	PVHVR(1)PPMPPR(0.999)YPAPYGER(0.001)	2	PSFTQQILCPKPVHVRPPMPPRYPAPYGERM	5	74	5	0.999991	95.654	13710000	5953400	0	54065000	36171000	31668000	Mol. Cell. Proteomics 13:372-387(2014);Nat Commun 8:15571(2017);	Nat Commun 8:15571(2017);
Q86TB9-2	PATL1	Protein PAT1 homolog 1	PVHVR(1)PPMPPR(0.999)YPAPYGER(0.001)	2	ILCPKPVHVRPPMPPRYPAPYGERMSPNQLC	11	80	5	0.99948	95.654	13710000	5953400	0	0	36171000	31668000	Mol. Cell. Proteomics 13:372-387(2014);Nat Commun 8:15571(2017);	Nat Commun 8:15571(2017);
Q86UK7-2	ZNF598	Zinc finger protein 598	LLPAPR(0.986)AYLVPENFR(0.014)	1	ATTTTTKAPRLLPAPRAYLVPENFRERNLQL	6	737	3	0.986287	47.201	5021700	4529100	4840900	0	0	0	Nat Commun 8:15571(2017);
Q86UU0-3	BCL9L	B-cell CLL/lymphoma 9-like protein	GGPPFPGPR(0.902)FPGNQIQR(0.098)	1	QDPMQLRGGPPFPGPRFPGNQIQRVPGFGGM	9	602	3	0.902138	44.601	0	0	0	0	4538900	0	Nat Commun 8:15571(2017);	Nat Commun 8:15571(2017);
Q86UU0-3	BCL9L	B-cell CLL/lymphoma 9-like protein	GPMDVQDPMQLR(0.998)GGPPFPGPR(0.484)FPGNQIQR(0.518)	2	AQLRGPMDVQDPMQLRGGPPFPGPRFPGNQI	12	593	4	0.998231	48.389	0	0	0	0	0	11605000	Nat Commun 8:15571(2017);	Nat Commun 8:15571(2017);
Q86UU0-3	BCL9L	B-cell CLL/lymphoma 9-like protein	EELLR(1)HQLLEK	1	EAERFMTPRVREELLRHQLLEKRSMGMQRPL	5	680	4	1	155	360370000	413710000	414570000	145960000	88681000	84890000	Nat Commun 8:15571(2017);	Nat Commun 8:15571(2017);
Q86UW9-2	DTX2	Probable E3 ubiquitin-protein ligase DTX2	YR(1)HSMTNLPAYPVPQHPPHR	1	QCLSGSRTGPVSGRYRHSMTNLPAYPVPQHP	2	215	5	0.999989	49.708	14447000	8603700	0	0	2560800	0	Mol. Cell. Proteomics 13:372-387(2014)
Q86Y37-4	CACUL1	CDK2-associated and cullin domain-containing protein 1	ITNHLER(1)VSK	1	QMYSDLIKKITNHLERVSKELQASPPDLYIE	7	70	3	1	49.418	5010800	4899000	5386200	0	2578400	3992100
Q8IUE6	HIST2H2AB	Histone H2A type 2-B	HLQLAVR(1)NDEELNK	1	NKKTRIIPRHLQLAVRNDEELNKLLGGVTIA	7	89	3	1	67.252	0	0	0	117370000	0	0
Q8IVT2	MISP	Mitotic interactor and substrate of PLK1	VTR(1)YPILGIPQAHR	1	__________MDRVTRYPILGIPQAHRGTGL	3	6	3	1	80.469	32083000	25746000	38433000	0	4063500	0	Nat Commun 8:15571(2017);	Nat Commun 8:15571(2017);
Q8IW35	CEP97	Centrosomal protein of 97 kDa	LPMILTQR(1)	1	ISQATSEKLPMILTQRSVALGQDKVALQKLN	8	544	2	1	64.866	0	6164400	18811000	0	0	0
Q8IWZ8	SUGP1	SURP and G-patch domain-containing protein 1	FR(1)PNPLNNPR	1	EYEAFRKRMMLAYRFRPNPLNNPRRPYY___	2	633	3	1	63.184	0	0	0	0	5518000	0	Nat Commun 8:15571(2017);
Q8N3J3-3	C17orf53	Uncharacterized protein C17orf53	TSSGLFPR(1)IPLQPQAPVSSIGSPVGTPK	1;2	SSCSTPSRTSSGLFPRIPLQPQAPVSSIGSP	8	337	4	1	214.53	6307500000	6411300000	5596900000	3065100000	2639500000	2809100000	Mol. Cell. Proteomics 13:372-387(2014);Nat Commun 8:15571(2017);	Nat Commun 8:15571(2017);
Q8N3J3-3	C17orf53	Uncharacterized protein C17orf53	TPNSSCSTPSR(1)TSSGLFPR(1)IPLQPQAPVSSIGSPVGTPK	2	LPRPRTPNSSCSTPSRTSSGLFPRIPLQPQA	11	329	4	1	185.5	63457000	72079000	91141000	22191000	137200000	8241500	Mol. Cell. Proteomics 13:372-387(2014);Nat Commun 8:15571(2017);	Nat Commun 8:15571(2017);
Q8N4N3-2	KLHL36	Kelch-like protein 36	TVQVYDR(1)EADK		SWENTAFSKTVQVYDREADKWSRGVDLPKAI	7	507	2	1	72.485	4010200	0	0	10480000	8672200	10358000
Q8N7H1	LINC01465	Putative uncharacterized protein encoded by LINC01465	SAVR(1)HQLVLDCPR	1	________MGGKSAVRHQLVLDCPREAASSA	4	8	3	1	130.56	16716000	13757000	16973000	50629000	35932000	37451000
Q8ND83-3	SLAIN1	SLAIN motif-containing protein 1	VHSVGHFPVSIR(1)QPLK	1	LQHRVHSVGHFPVSIRQPLKATAYVSPTVQG	12	94	4	1	123.88	1381300000	1029200000	1423600000	14877000	13647000	8614900
Q8NEZ4-2	KMT2C	Histone-lysine N-methyltransferase 2C	SPVAPPLGPR(1)YAVFPK	1	YPGNIRSPVAPPLGPRYAVFPKDQRGPYPPD	10	1515	2	1	114.4	69950000	67333000	76647000	315710000	134840000	152600000	Nat Commun 8:15571(2017);	Nat Commun 8:15571(2017);
Q8NEZ4-2	KMT2C	Histone-lysine N-methyltransferase 2C	INPGLEYR(1)QHLLLR	1	MGLVSSHRINPGLEYRQHLLLRGPPPGSANP	8	3257	3	0.999998	115.14	18109000	17035000	22711000	23465000	19598000	16483000	Nat Commun 8:15571(2017);	Nat Commun 8:15571(2017);
Q8NEZ4-2	KMT2C	Histone-lysine N-methyltransferase 2C	ISEGFTR(1)SSMTR(1)PVLMPNQDPFLQAAQNR	2	QPPATPRPRISEGFTRSSMTRPVLMPNQDPF	7	1296	4	1	77.641	6855800	8349700	13189000	0	0	1290700	Nat Commun 8:15571(2017);	Nat Commun 8:15571(2017);
Q8NEZ4-2	KMT2C	Histone-lysine N-methyltransferase 2C	ISEGFTR(1)SSMTR(1)PVLMPNQDPFLQAAQNR	2	PRPRISEGFTRSSMTRPVLMPNQDPFLQAAQ	12	1301	4	1	77.641	6855800	8349700	13189000	0	0	1290700	Nat Commun 8:15571(2017);	Nat Commun 8:15571(2017);
Q8NF64-3	ZMIZ2	Zinc finger MIZ domain-containing protein 2	LPQHGYPGPPQAQPLPR(1)QGVK	1;2	PQHGYPGPPQAQPLPRQGVKRTYSEVYPGQQ	17	230	4	1	106.51	43131000	33238000	55113000	191900000	210250000	85510000	Mol. Cell. Proteomics 13:372-387(2014);Nat Commun 8:15571(2017);	Nat Commun 8:15571(2017);
Q8NF64-3	ZMIZ2	Zinc finger MIZ domain-containing protein 2	AAGMTPLYAGQR(1)LPQHGYPGPPQAQPLPR(1)QGVK	1;2	NPTRAAGMTPLYAGQRLPQHGYPGPPQAQPL	12	213	4	1	110.14	41444000	31538000	51517000	183090000	210660000	88301000	Mol. Cell. Proteomics 13:372-387(2014);Nat Commun 8:15571(2017);	Nat Commun 8:15571(2017);
Q8NFD5	ARID1B	AT-rich interactive domain-containing protein 1B	R(1)PQLYGMGSNPHSQPQQSSPYPGGSYGPPGPQR(0.472)YPIGIQGR(0.528)	2	MGRSQGSPMDPMVMKRPQLYGMGSNPHSQPQ	1	525	5	1	84.713	0	0	0	0	29676000	7552600	Mol. Cell. Proteomics 13:372-387(2014);Nat Commun 8:15571(2017);	Nat Commun 8:15571(2017);
Q8NI36	WDR36	WD repeat-containing protein 36	SAPFFIPTIPGLVPR(1)YAAPEQNNDPQQSK	1	KSAPFFIPTIPGLVPRYAAPEQNNDPQQSKV	15	800	3	1	106.63	1357800000	1104200000	1150000000	139130000	154060000	153360000	Nat Commun 8:15571(2017);	Nat Commun 8:15571(2017);
Q8TCU5	GRIN3A	Glutamate receptor ionotropic, NMDA 3A	MR(1)R(1)LSLWWLLSR	2	______________MRRLSLWWLLSRVCLLL	2	2	2	0.999993	51.346	0	0	343480000	0	0	0
Q8TCU5	GRIN3A	Glutamate receptor ionotropic, NMDA 3A	MR(1)R(1)LSLWWLLSR	2	_____________MRRLSLWWLLSRVCLLLP	3	3	2	0.999993	51.346	0	0	343480000	0	0	0
Q8TES7-5	FBF1	Fas-binding factor 1	KQEQHMHQEHLSLAQQR(0.81)LQLDR(0.19)	1	QEQHMHQEHLSLAQQRLQLDRARQDLPSSLV	17	1037	5	0.810485	43.116	0	2853300	5111900	0	0	0
Q8TEX9	IPO4	Importin-4	ELAVSALGAIATAAQASLLPYFPAIMEHLR(1)	1	QASLLPYFPAIMEHLREFLLTGREDLQPVQI	30	527	3	1	48.867	0	0	37406000	0	19028000	0
Q8TF74	WIPF2	WAS/WASL-interacting protein family member 2	GR(1)GALLQDICK	1	ANTEQPKLSRDEQRGRGALLQDICKGTKLKK	2	37	3	1	135.83	17007000	14614000	26930000	49881000	0	23118000	Nat Commun 8:15571(2017);
Q8WUF5	PPP1R13L	RelA-associated inhibitor	LQNAFWEHGASR(1)AMLPGSPLFTR(1)APPPK	1;2	HGASRAMLPGSPLFTRAPPPKLQPQPQPQPQ	23	400	4	1	96.303	91548000	73196000	125020000	0	0	0	Nat Commun 8:15571(2017);	Nat Commun 8:15571(2017);
Q8WUF5	PPP1R13L	RelA-associated inhibitor	QLESLWSDSPAPPGPQAGPPSR(0.102)PPR(0.764)YSSSSIPEPFGSR(0.134)	1	PAPPGPQAGPPSRPPRYSSSSIPEPFGSRGS	25	69	4	0.764037	137.44	42801000	0	56914000	0	0	0	Nat Commun 8:15571(2017);	Nat Commun 8:15571(2017);
Q8WUF5	PPP1R13L	RelA-associated inhibitor	LQNAFWEHGASR(1)AMLPGSPLFTR(1)APPPK	2	MIFKLQNAFWEHGASRAMLPGSPLFTRAPPP	12	389	4	1	96.303	18915000	9502700	31270000	0	0	0	Nat Commun 8:15571(2017);	Nat Commun 8:15571(2017);
Q8WXF1	PSPC1	Paraspeckle component 1	TGSETPQAPMSGVGPVSGGPGGFGR(0.947)GSQGGNFEGPNKR(0.053)	1	MSGVGPVSGGPGGFGRGSQGGNFEGPNKRRR	25	507	4	0.946836	79.408	0	5790400	10068000	0	0	0
Q8WXF1	PSPC1	Paraspeckle component 1	MMLR(1)GNLK	1	____________MMLRGNLKQVRIEKNPARL	4	4	2	1	121.29	21282000	27375000	20011000	52912000	24448000	13084000
Q8WXX7-5	AUTS2	Autism susceptibility gene 2 protein	NDPLHR(0.83)LSTPR(0.17)	1	DPLGRDFLLRNDPLHRLSTPRLYEADRSFRD	6	524	3	0.830447	48.44	18286000	21596000	17332000	0	0	0
Q8WYB5-3	KAT6B	Histone acetyltransferase KAT6B	NMAASNIGISHSQR(1)LQTQIASK	1	QRNMAASNIGISHSQRLQTQIASKGHISMRT	14	1620	3	1	80.238	10806000	14545000	20350000	0	1645300	0
Q92547	TOPBP1	DNA topoisomerase 2-binding protein 1	TSLSR(1)SGCNSASSTPDSTR	1	ATSIVKPQGQRTSLSRSGCNSASSTPDSTRS	5	1096	3	1	90.348	6019500	6257500	6549600	0	4078300	3173700
Q92576-2	PHF3	PHD finger protein 3	MMGPLSQASR(1)YIGPQNFYQVK	1	PGQPQRMMGPLSQASRYIGPQNFYQVKDIRR	10	1789	3	1	61.477	0	0	0	0	0	8677300	Mol. Cell. Proteomics 13:372-387(2014)
Q92621	NUP205	Nuclear pore complex protein Nup205	PLLMEEISTVLQYVVGR(1)NK	1	LLMEEISTVLQYVVGRNKLLQCLHAKRHALE	17	1269	3	1	42.647	13541000	12375000	20201000	0	0	0
Q92734-2	TFG	Protein TFG	NR(1)PPFGQGYTQPGPGYR	1	TMTPPPSGPNPYARNRPPFGQGYTQPGPGYR	2	381	3	1	128.22	9397800	5666000	10352000	30166000	19162000	7896500
Q92804-2	TAF15	TATA-binding protein-associated factor 2N	SR(1)GGYGGDR(1)GGGSGYGGDR	2	GGYGGDRGGYGGDRSRGGYGGDRGGGSGYGG	2	525	4	0.999998	57.595	171560000	122530000	184740000	556000000	112000000	160620000	Cell Res. 315:1273-1286(2009)
Q92804-2	TAF15	TATA-binding protein-associated factor 2N	SR(1)GGYGGDR(1)GGGSGYGGDR	2	GGYGGDRSRGGYGGDRGGGSGYGGDRSGGYG	9	532	4	0.999996	57.595	171560000	122530000	184740000	556000000	112000000	160620000	Cell Res. 315:1273-1286(2009)
Q92804-2	TAF15	TATA-binding protein-associated factor 2N	GPMTGSSGGDR(1)GGFK	1	DKDGRGPMTGSSGGDRGGFKNFGGHRDYGPR	11	203	3	1	116.3	9045600	6015100	9067000	27642000	15819000	26585000	Cell Res. 315:1273-1286(2009)
Q92804-2	TAF15	TATA-binding protein-associated factor 2N	SGGGYGGDR(1)GGGYGGDR(1)GGYGGK	2	GGYGGDRSGGGYGGDRGGGYGGDRGGYGGKM	9	559	4	1	72.968	21197000	10976000	21953000	23361000	16963000	20704000	Cell Res. 315:1273-1286(2009)
Q92804-2	TAF15	TATA-binding protein-associated factor 2N	SGGGYGGDR(1)GGGYGGDR(1)GGYGGK	2	GGGYGGDRGGGYGGDRGGYGGKMGGRNDYRN	17	567	4	1	72.968	21197000	10976000	21953000	23361000	16963000	20704000	Cell Res. 315:1273-1286(2009)
Q92945	KHSRP;FUBP1;FUBP3	Far upstream element-binding protein 2;Far upstream element-binding protein 1;Far upstream element-binding protein 3	IQNDAGVR(1)IQFK	1	RNGEMIKKIQNDAGVRIQFKPDDGISPERAA;RNGEMIKKIQNDAGVRIQFKPDDGTTPERIA;RSGEMIKKIQNDAGVRIQFKQDDGTGPEKIA	8	355	3	1	70.942	0	2914100	0	0	0	0
Q93009-3	USP7	Ubiquitin carboxyl-terminal hydrolase 7	LQEEKR(1)IEAQK	1	HDIPQQLVERLQEEKRIEAQKRKERQEAHLY	6	533	2	1	107.29	2559600	2901300	2729700	3819500	2150700	1840500
Q93074-2	PTCD1;MED12	Pentatricopeptide repeat-containing protein 1, mitochondrial;Mediator of RNA polymerase II transcription subunit 12	LR(1)QQLQAK	1	ESPWKDSALQSALKLRQQLQAKNFELNLKTY;VYRQQQPAVPQGQRLRQQLQAKIQSQGMLGQ	2	235	2	1	160.03	1636300000	1630800000	1803400000	781270000	365720000	223780000	Mol. Cell. Proteomics 13:372-387(2014);Nat Commun 8:15571(2017);	Nat Commun 8:15571(2017);
Q93074-2	MED12	Mediator of RNA polymerase II transcription subunit 12	VDPYR(1)PVR(1)LPMQK		PLPAGGPRVDPYRPVRLPMQKLPTRPTYPGV	8	1862	3	1	81.625	103820000	107060000	149620000	153970000	103130000	103360000	Mol. Cell. Proteomics 13:372-387(2014);Nat Commun 8:15571(2017);	Nat Commun 8:15571(2017);
Q93074-2	MED12	Mediator of RNA polymerase II transcription subunit 12	VDPYR(1)PVR(1)LPMQK		QNQPLPAGGPRVDPYRPVRLPMQKLPTRPTY	5	1859	3	1	81.625	61341000	67238000	98509000	47287000	27670000	25946000	Mol. Cell. Proteomics 13:372-387(2014);Nat Commun 8:15571(2017);	Nat Commun 8:15571(2017);
Q96A00	PPP1R14A	Protein phosphatase 1 regulatory subunit 14A	AAQR(1)LGK	1	___________MAAQRLGKRVLSKLQSPSRA	4	5	2	1	99.919	3067900	2528500	3633700	120880000	112020000	105120000
Q96A05	ATP6V1E2	V-type proton ATPase subunit E 2	ILMSTMR(1)		EKQIEQQKKILMSTMRNQARLKVLRARNDLI	7	76	2	1	50.31	0	1577500	0	15865000	0	0
Q96CU9	FOXRED1	FAD-dependent oxidoreductase domain-containing protein 1	VLPHGMGR(0.816)GLLTR(0.184)	1	____MIRRVLPHGMGRGLLTRRPGTRRGGFS	8	12	3	0.816173	45.653	5832100	5931400	9135400	0	59439000	8772900
Q96EV2	RBM33	RNA-binding protein 33	PAVGPQR(1)FPGPPEFPQHTPGPVPNSFSQPPR(0.827)LPLQDQWR(0.173)	1;2	LLPVPSQPRPAVGPQRFPGPPEFPQHTPGPV	7	418	5	1	210	38588000	24999000	0	83790000	55427000	189550000	Mol. Cell. Proteomics 13:372-387(2014);Nat Commun 8:15571(2017);	Nat Commun 8:15571(2017);
Q96EV2	RBM33	RNA-binding protein 33	PAVGPQR(1)FPGPPEFPQHTPGPVPNSFSQPPR(0.859)LPLQDQWR(0.141)	2	QHTPGPVPNSFSQPPRLPLQDQWRAPPPPQD	31	442	5	0.858617	210	16212000	0	0	83790000	55427000	108450000	Mol. Cell. Proteomics 13:372-387(2014);Nat Commun 8:15571(2017);	Nat Commun 8:15571(2017);
Q96EV2	RBM33	RNA-binding protein 33	MQCPQR(0.984)QGLR(0.016)	1	TAQPQASSSRMQCPQRQGLRHNTTSQNVSKR	6	678	3	0.983724	74.376	0	6664900	4892000	15849000	65058000	15980000	Mol. Cell. Proteomics 13:372-387(2014);Nat Commun 8:15571(2017);	Nat Commun 8:15571(2017);
Q96FF7		Uncharacterized protein LOC113230	VR(1)PVLNLPGPGPALPR	1	LSPGRAGRELVELRVRPVLNLPGPGPALPRA	2	40	3	1	91.307	46955000	43252000	57531000	0	0	0	Nat Commun 8:15571(2017);	Nat Commun 8:15571(2017);
Q96FF7		Uncharacterized protein LOC113230	FFEAAAGSGSSAGAGDGAGPQR(0.759)LPEPGGR(0.12)PR(0.12)	1	GSGSSAGAGDGAGPQRLPEPGGRPRSAVQGG	22	123	4	0.759412	76.691	6617900	3906600	7316600	0	0	0	Nat Commun 8:15571(2017);	Nat Commun 8:15571(2017);
Q96FS4	SIPA1	Signal-induced proliferation-associated protein 1	PVR(1)GPLLR	1	ARPPLTPHTFEPRPVRGPLLRSGSDAGEARP	3	47	3	0.999999	72.789	8815900	12439000	19561000	0	53780000	11898000
Q96HA1	POM121	Nuclear envelope pore membrane protein POM 121	DCGTLPNR(0.992)FVITPR(0.008)	1	PSRRPSPRDCGTLPNRFVITPRRRYPIHQAQ	8	223	3	0.992114	73.466	7951900	4976500	10556000	0	0	0	Nat Commun 8:15571(2017);
Q96JK9	MAML3	Mastermind-like protein 3	TSGELGPFNNGASYPLQAGQPR(1)LTK	1	PFNNGASYPLQAGQPRLTKQHFPQGLSQSVV	22	996	3	1	191.59	12909000	8925300	12540000	287940000	147830000	146590000	Nat Commun 8:15571(2017);	Nat Commun 8:15571(2017);
Q96JY6-5	PDLIM2	PDZ and LIM domain protein 2	GLAGAPGR(1)MR(1)	2	LCCAPGSRGLAGAPGRMRAPPAGRSQPAGGP	8	48	2	1	45.718	0	0	0	0	0	3356600
Q96JY6-5	PDLIM2	PDZ and LIM domain protein 2	GLAGAPGR(1)MR(1)	2	CAPGSRGLAGAPGRMRAPPAGRSQPAGGPGD	10	50	2	1	45.718	0	0	0	0	0	3356600
Q96L96	ALPK3	Alpha-protein kinase 3	LTGLLDR(1)	1	LLSPCTSRRLTGLLDREVQAGRQALAAARGS	7	1248	1	1	44.803	0	0	0	32161000	0	0
Q96QC0	PPP1R10	Serine/threonine-protein phosphatase 1 regulatory subunit 10	GMQHFPPGPGGPMPGPHGGPGGPVGPR(1)LLGPPPPPR	1	PMPGPHGGPGGPVGPRLLGPPPPPRGGDPFW	27	665	5	0.999674	131.5	19586000	14268000	24732000	77474000	34866000	10410000	Nat Commun 8:15571(2017);	Nat Commun 8:15571(2017);
Q96SN8-4	CDK5RAP2	CDK5 regulatory subunit-associated protein 2	ITQELSDLQQER(1)		SIKKITQELSDLQQERERLEKDLEEAHREKS	12	415	3	1	40.589	3418600	2866500	4812900	0	0	0
Q99575	POP1	Ribonucleases P/MRP protein subunit POP1	R(1)LQEIAQK		MRRRAMSHNVKRLPRRLQEIAQKEAEKAVHQ	1	154	3	1	44.395	8225400	8776500	10441000	0	2174500	3999900
Q99729-3	HNRNPAB	Heterogeneous nuclear ribonucleoprotein A/B	R(1)GGHQNNYKPY	1	GGGGQGSTNYGKSQRRGGHQNNYKPY_____	1	275	3	1	114.93	735080000	256130000	597830000	5552400000	558340000	483880000
Q99878	HIST1H2AC;HIST3H2A;HIST1H2AB;H2AFX;HIST1H2AA;HIST1H2AJ;HIST1H2AH;H2AFJ;HIST1H2AD;HIST1H2AG;HIST2H2AC;HIST2H2AA3	Histone H2A type 1-C;Histone H2A type 3;Histone H2A type 1-B/E;Histone H2AX;Histone H2A type 1-A;Histone H2A type 1-J;Histone H2A type 1-H;Histone H2A.J;Histone H2A type 1-D;Histone H2A type 1;Histone H2A type 2-C;Histone H2A type 2-A	HLQLAIR(1)NDEELNK	1	NKKTRIIPRHLQLAIRNDEELNKLLGKVTIA;NKKTRIIPRHLQLAIRNDEELNKLLGRVTIA	7	89	3	1	74.46	0	0	0	8658500	0	0
Q9BTD8-4	RBM42	RNA-binding protein 42	AAAAATVVPPMVGGPPFVGPVGFGPGDR(0.989)SHLDSPEAR(0.011)	1	GGPPFVGPVGFGPGDRSHLDSPEAREAMFLR	28	130	4	0.988969	107.3	52477000	62048000	75346000	0	0	0	Mol. Cell. Proteomics 13:372-387(2014)
Q9BTZ2-8	DHRS4;DHRS4L1	Dehydrogenase/reductase SDR family member 4;Putative dehydrogenase/reductase SDR family member 4-like 1	TSFSR(1)MLWMDK	1	RVNCLAPGLIKTSFSRMLWMDKEKEESMKET	5	169	2	1	63.486	9246000	8687100	9946900	22316000	0	0
Q9BUT9	FAM195A	Protein FAM195A	AQPFAQPPGPWPLSSPGPR(0.824)LVFNR(0.176)	1	FAQPPGPWPLSSPGPRLVFNRVNGRRAPSTS	19	65	3	0.823931	111.57	511340000	0	0	498040000	2568200000	0	Nat Commun 8:15571(2017);	Nat Commun 8:15571(2017);
Q9BYB0-3	SHANK3	SH3 and multiple ankyrin repeat domains protein 3	PEEDGAR(1)R(1)R(1)	3	MKVVSVTRKPEEDGARRRAPPPPKRAPSTTL	7	555	2	1	48.504	0	0	2377300	0	0	2602600
Q9BYB0-3	SHANK3	SH3 and multiple ankyrin repeat domains protein 3	PEEDGAR(1)R(1)R(1)	3	KVVSVTRKPEEDGARRRAPPPPKRAPSTTLT	8	556	2	1	48.504	0	0	2377300	0	0	2602600
Q9BYB0-3	SHANK3	SH3 and multiple ankyrin repeat domains protein 3	PEEDGAR(1)R(1)R(1)	3	VVSVTRKPEEDGARRRAPPPPKRAPSTTLTL	9	557	2	1	48.504	0	0	2377300	0	0	2602600
Q9BYD6	MRPL1	39S ribosomal protein L1, mitochondrial	AAAVR(1)CMGR(1)	2	__________MAAAVRCMGRALIHHQRHSLS	5	6	2	1	48.504	2203200	0	0	0	0	5159200
Q9BYD6	MRPL1	39S ribosomal protein L1, mitochondrial	AAAVR(1)CMGR(1)	2	______MAAAVRCMGRALIHHQRHSLSKMVY	9	10	2	1	48.504	2203200	0	0	0	0	5159200
Q9BYN0	SRXN1	Sulfiredoxin-1	AGAGR(1)GAPEGPGPSGGAQGGSIHSGR	1	MGLRAGGTLGRAGAGRGAPEGPGPSGGAQGG	5	16	4	1	108.25	8789900	5105100	17149000	0	0	0
Q9C0J8	WDR33	pre-mRNA 3' end processing protein WDR33	FFHMPR(1)FQHQAPR	1	MATEIGSPPRFFHMPRFQHQAPRQLFYKRPD	6	16	4	0.999999	103.91	0	0	0	7383800	22722000	3565900	Mol. Cell. Proteomics 13:372-387(2014);Nat Commun 8:15571(2017);	Nat Commun 8:15571(2017);
Q9C0J8	WDR33	pre-mRNA 3' end processing protein WDR33	SGSNWGR(1)GSNMNSGPPR	1	SGTPSRGGRSGSNWGRGSNMNSGPPRRGASR	7	1315	2	1	205.62	70738000	88373000	103760000	270760000	663050000	76150000	Mol. Cell. Proteomics 13:372-387(2014);Nat Commun 8:15571(2017);	Nat Commun 8:15571(2017);
Q9C0J8	WDR33	pre-mRNA 3' end processing protein WDR33	TPLLGDGPR(1)APFNQEGQSTGPPPLIPGLGQQGAQGR	1	IPFQQQKTPLLGDGPRAPFNQEGQSTGPPPL	9	915	4	1	185.68	2646400000	2390800000	2149700000	882050000	812510000	770260000	Mol. Cell. Proteomics 13:372-387(2014);Nat Commun 8:15571(2017);
Q9C0K0-2	BCL11B	B-cell lymphoma/leukemia 11B	LPGTPPLFSPPPR(0.997)HHLDPHR(0.003)	1	EGRLPGTPPLFSPPPRHHLDPHRLSAEEMGL	13	251	5	0.996764	90.754	0	12969000	41761000	0	0	0	Nat Commun 8:15571(2017);	Nat Commun 8:15571(2017);
Q9H089	LSG1	Large subunit GTPase 1 homolog	APAGGSLGR(0.957)ALMR(0.043)		__MGRRRAPAGGSLGRALMRHQTQRSRSHRH	9	14	3	0.957343	67.08	0	3056600	0	10147000	53638000	0	Nat Commun 8:15571(2017);
Q9H0D6-2	XRN2	5'-3' exoribonuclease 2	GSGTGIYSNAAPPPVTYQGNLYR(0.858)PLLR(0.142)	1	SNAAPPPVTYQGNLYRPLLRGQAQIPKLMSN	23	771	3	0.858153	76.186	0	0	0	23787000	0	19240000	Nat Commun 8:15571(2017);	Nat Commun 8:15571(2017);
Q9H0D6-2	XRN2	5'-3' exoribonuclease 2	YPLPPPSGR(1)YNWN	1	YPREGRKYPLPPPSGRYNWN___________	9	870	2	1	143.01	79663000	68568000	110870000	121630000	60123000	83863000	Mol. Cell. Proteomics 13:372-387(2014);Nat Commun 8:15571(2017);	Nat Commun 8:15571(2017);
Q9H7S9	ZNF703	Zinc finger protein 703	NPHTLGLSR(1)YHPYGK	1	PGSLSLRNPHTLGLSRYHPYGKSHLSTAGGL	9	544	4	1	53.377	9459900	5569200	13562000	4542600	1951100	2633100	Nat Commun 8:15571(2017);
Q9H7U1-2	CCSER2	Serine-rich coiled-coil domain-containing protein 2	AVDLTKPYQNQQLSIR(0.984)VPLR(0.016)	1	AVDLTKPYQNQQLSIRVPLRSSMLTRNSRQP	16	262	4	0.983972	146.78	0	19036000	27883000	35817000	10750000	10862000	Nat Commun 8:15571(2017);	Nat Commun 8:15571(2017);
Q9HAH7	FBRS	Probable fibrosin-1	LHR(1)SPLTFPAWVR(0.961)PPEAAR(0.039)	2	PPAFASPPDPWGRLHRSPLTFPAWVRPPEAA	3	229	4	0.999998	56.851	6325500	3769100	4850600	0	0	0	Nat Commun 8:15571(2017);	Nat Commun 8:15571(2017);
Q9HAH7	FBRS	Probable fibrosin-1	LHR(1)SPLTFPAWVR(0.961)PPEAAR(0.039)	2	WGRLHRSPLTFPAWVRPPEAARTPGSDKERP	13	239	4	0.961187	56.851	6325500	3769100	4850600	0	0	0	Mol. Cell. Proteomics 13:372-387(2014);Nat Commun 8:15571(2017);	Nat Commun 8:15571(2017);
Q9HBM6	TAF9B;TAF9	Transcription initiation factor TFIID subunit 9B;Transcription initiation factor TFIID subunit 9	YCLTAPNYR(1)LK	1	PRLPPDRYCLTAPNYRLKSLIKKGPNQGRLV	9	128	3	1	72.006	11261000	8936100	11044000	0	0	0	Nat Commun 8:15571(2017);
Q9HCM3-2	KIAA1549	UPF0606 protein KIAA1549	MDLQR(1)AAIILGYR	1	SAVKSSDLINKMDLQRAAIILGYRIQGVIAQ	5	1267	2	1	68.735	0	2177400	6327300	0	0	0
Q9NQB0-14	TCF7L2	Transcription factor 7-like 2	WPLLDVQAGSLQSR(1)QALK	1	MKWPLLDVQAGSLQSRQALKDARSPSPAHIV	14	146	3	1	86.497	5224600	6447500	6503100	0	0	0
Q9NR12	PDLIM7	PDZ and LIM domain protein 7	ASAPAADPPR(1)YTFAPSVSLNK	1	QSKPQKASAPAADPPRYTFAPSVSLNKTARP	10	103	3	1	105.17	840670000	798500000	1008200000	206180000	0	117310000	Mol. Cell. Proteomics 13:372-387(2014);Nat Commun 8:15571(2017);	Nat Commun 8:15571(2017);
Q9NRJ4	TULP4	Tubby-related protein 4	LTVPR(1)YSIPTGDPPPYPEIASQLAQGR	1	PQPCSSATLNRLTVPRYSIPTGDPPPYPEIA	5	950	3	1	128.98	400380000	379670000	395710000	394570000	304090000	366820000	Nat Commun 8:15571(2017);	Nat Commun 8:15571(2017);
Q9NRJ4	TULP4	Tubby-related protein 4	MAQLADSPR(1)APLQPLAK	1	NREATLKMAQLADSPRAPLQPLAKSKGGPGG	9	1006	3	1	63.128	9044600	7641700	8588800	0	0	2689500	Nat Commun 8:15571(2017);	Nat Commun 8:15571(2017);
Q9NRR4-2	DROSHA	Ribonuclease 3	MQGNTCHR(0.998)MSFHPGR(0.002)	1	_______MMQGNTCHRMSFHPGRGCPRGRGG	8	9	4	0.997579	64.104	0	0	0	0	6290200	0
Q9NSV4-7	DIAPH3	Protein diaphanous homolog 3	HQPR(1)LHHPAQGSAAGTPYPSSASLR	1	_________MERHQPRLHHPAQGSAAGTPYP	4	7	4	0.999997	55.734	0	0	9006300	0	0	0
Q9NTJ3-2	SMC4	Structural maintenance of chromosomes protein 4	ITYER(1)DSFR(1)QAYEDLR(1)	3	LYLQRVAELDKITYERDSFRQAYEDLRKQRL	5	1059	3	1	48.625	0	0	0	22456000	0	13723000
Q9NTJ3-2	SMC4	Structural maintenance of chromosomes protein 4	ITYER(1)DSFR(1)QAYEDLR(1)	3	RVAELDKITYERDSFRQAYEDLRKQRLNEFM	9	1063	3	1	48.625	0	0	0	22456000	0	13723000
Q9NTJ3-2	SMC4	Structural maintenance of chromosomes protein 4	ITYER(1)DSFR(1)QAYEDLR(1)	3	ITYERDSFRQAYEDLRKQRLNEFMAGFYIIT	16	1070	3	1	48.625	0	0	0	22456000	0	13723000
Q9NUL3-8	STAU2	Double-stranded RNA-binding protein Staufen homolog 2	GMYNQR(1)YHCPVPK	1	PNYRANYNFRGMYNQRYHCPVPKIFYVQLTV	6	99	3	1	56.02	19810000	12413000	17983000	0	2724400	2829900	Nat Commun 8:15571(2017);	Nat Commun 8:15571(2017);
Q9NW82	WDR70	WD repeat-containing protein 70	SHKPEPPVAGPGR(0.859)GGR(0.141)	1	PLKSHKPEPPVAGPGRGGRVGTHGGTLSSYI	13	573	4	0.858943	57.328	0	0	0	60936000	21872000	0
Q9NWB6	ARGLU1	Arginine and glutamate-rich protein 1	R(1)EELER(1)ILEENNR(1)	3	ELAAQKAREEEERAKREELERILEENNRKIA	1	198	2	1	45.997	2827500	2306300	4989100	0	8715000	0
Q9NWB6	ARGLU1	Arginine and glutamate-rich protein 1	R(1)EELER(1)ILEENNR(1)	3	KAREEEERAKREELERILEENNRKIAEAQAK	6	203	2	1	45.997	2827500	2306300	4989100	0	8715000	0
Q9NWB6	ARGLU1	Arginine and glutamate-rich protein 1	R(1)EELER(1)ILEENNR(1)	3	RAKREELERILEENNRKIAEAQAKLAEEQLR	13	210	2	1	45.997	2827500	2306300	4989100	0	8715000	0
Q9NYL2	ZAK	Mitogen-activated protein kinase kinase kinase MLT	YGR(1)GSISLNSSPR(0.419)GR(0.581)	2	SERGRYSDRSRNKYGRGSISLNSSPRGRYSG	3	683	4	0.999991	52.265	0	0	0	0	5015800	0
Q9NYV6	RRN3	RNA polymerase I-specific transcription initiation factor RRN3	AAPLLHTR(1)LPGDAAASSSAVKK	1	_______MAAPLLHTRLPGDAAASSSAVKKL	8	9	4	1	124.26	11369000	6835800	12052000	0	2148600	4566600
Q9NYV6-4	RRN3	RNA polymerase I-specific transcription initiation factor RRN3	MIASHFVPPR(1)VIIK	1	______MIASHFVPPRVIIKEGDVDVSDSDD	10	10	2	1	44.309	0	0	0	94890000	0	0
Q9P0W8-3	SPATA7	Spermatogenesis-associated protein 7	ATSVLPR(1)YGPPCLFK	1	_MDGSRRVRATSVLPRYGPPCLFKGHLSTKS	7	15	3	1	61.167	36232000	0	51487000	0	0	0	Nat Commun 8:15571(2017);	Nat Commun 8:15571(2017);
Q9P270	SLAIN2	SLAIN motif-containing protein 2	LQQPR(1)LSLQGHPTDLQTSNVK	1	SRVSPQPMISRLQQPRLSLQGHPTDLQTSNV	5	389	4	1	53.536	8339400	8012200	10832000	0	0	0
Q9P2D1	CHD7	Chromodomain-helicase-DNA-binding protein 7	FSPNPPQQGAVR(0.957)PQTLNFSSR(0.043)	1	HSPRFSPNPPQQGAVRPQTLNFSSRSQTVPS	12	286	3	0.957052	47.754	0	0	0	7839000	22252000	8390300	Nat Commun 8:15571(2017);	Nat Commun 8:15571(2017);
Q9P2K3	RCOR3	REST corepressor 3	FIQPR(1)PTLNQPPPPLIRPANSMPPR	1;2	RQPPPLQQQARFIQPRPTLNQPPPPLIRPAN	5	445	4	1	106.73	7137100	3112100	7682000	80943000	121900000	30175000	Mol. Cell. Proteomics 13:372-387(2014);Nat Commun 8:15571(2017);	Nat Commun 8:15571(2017);
Q9P2K3	RCOR3	REST corepressor 3	FIQPR(1)PTLNQPPPPLIR(0.864)PANSMPPR(0.136)	2	IQPRPTLNQPPPPLIRPANSMPPRLNPRPVL	17	457	4	0.864103	79.568	0	0	2954300	35081000	62977000	4213000	Mol. Cell. Proteomics 13:372-387(2014);Nat Commun 8:15571(2017);	Nat Commun 8:15571(2017);
Q9P2N5	RBM27	RNA-binding protein 27	DQPGTSAVPNLASVGTR(1)LPPPLPQNLLYTVSER(0.971)QPMYSR(0.029)	2	LPPPLPQNLLYTVSERQPMYSREHGAAASER	33	427	4	0.970687	105.48	64583000	33455000	48776000	0	0	0	Nat Commun 8:15571(2017);	Nat Commun 8:15571(2017);
Q9P2N5	RBM27	RNA-binding protein 27	DQPGTSAVPNLASVGTR(1)LPPPLPQNLLYTVSER	1;2	QPGTSAVPNLASVGTRLPPPLPQNLLYTVSE	17	411	4	1	116.35	108370000	55328000	97980000	40119000	68943000	202720000	Nat Commun 8:15571(2017);	Nat Commun 8:15571(2017);
Q9P2N5	RBM27	RNA-binding protein 27	GR(1)GSLNHMVVDHRPK	1	SSQGRGRGRGRGGRGRGSLNHMVVDHRPKAL	2	963	4	1	92.039	6158000	13811000	12544000	16162000	7946600	0	Nat Commun 8:15571(2017);	Nat Commun 8:15571(2017);
Q9P2R6-2	RERE	Arginine-glutamic acid dipeptide repeats protein	ER(1)LALAGPQLR(1)PEMSYPDR	2	PFASFHPGLNPLERERLALAGPQLRPEMSYP	2	824	4	1	137.61	27758000	21209000	30380000	6677600	6168300	0	Nat Commun 8:15571(2017);	Nat Commun 8:15571(2017);
Q9P2R6-2	RERE	Arginine-glutamic acid dipeptide repeats protein	ER(1)LALAGPQLR(1)PEMSYPDR	2	NPLERERLALAGPQLRPEMSYPDRLAAERIH	11	833	4	0.999999	137.61	27758000	21209000	30380000	6677600	6168300	0	Nat Commun 8:15571(2017);	Nat Commun 8:15571(2017);
Q9UJM3	ERRFI1	ERBB receptor feedback inhibitor 1	SIAGVAAQEIR(1)VPLK	1	____MSIAGVAAQEIRVPLKTGFLHNGRAMG	11	12	2	1	229.17	103440000	137950000	107850000	49076000	39381000	40236000
Q9UKV3-5	ACIN1	Apoptotic chromatin condensation inducer in the nucleus	GVEYGSGR(1)GHLGTFEGR	1	RGVLSGNRGVEYGSGRGHLGTFEGRWRKLPK	8	29	4	0.999823	92.935	4273700	7483000	6501200	11227000	2891700	3601300
Q9UPN9-2	TRIM33	E3 ubiquitin-protein ligase TRIM33	TPGQINLAQLR(1)LQHMQQQVYAQK	1	NHISKTPGQINLAQLRLQHMQQQVYAQKHQQ	11	515	4	1	153.36	13097000	4861800	8035100	0	9796300	11718000	Mol. Cell. Proteomics 13:372-387(2014);Nat Commun 8:15571(2017);	Nat Commun 8:15571(2017);
Q9UPR6	ZFR2	Zinc finger RNA-binding protein 2	R(1)IAQQLPR		LALLCSEKPTHSLLRRIAQQLPRQLQMVTED	1	691	3	0.999986	48.561	0	0	0	29832000	137750000	14260000
Q9UQ35	SRRM2	Serine/arginine repetitive matrix protein 2	MAPALSGANLTSPR(1)VPLSAYER	1	ARMAPALSGANLTSPRVPLSAYERVSGRTSP	14	2384	2	0.999998	142.01	944650000	965520000	1597000000	0	209300000	209790000	Mol. Cell. Proteomics 13:372-387(2014);Nat Commun 8:15571(2017);	Nat Commun 8:15571(2017);
Q9Y2K2-3	SIK3	Serine/threonine-protein kinase SIK3	HQQVPHILQGLLSPR(1)HSLTGHSDIR	1	RHQQVPHILQGLLSPRHSLTGHSDIRLPPTE	15	918	6	0.999963	131.59	15584000	12740000	46124000	0	0	0
Q9Y2W1	THRAP3	Thyroid hormone receptor-associated protein 3	NHPR(1)VYQNR	1	SRSYSPAHNRERNHPRVYQNRDFRGHNRGYR	4	66	3	0.999885	80.438	912570	0	0	0	10641000	5211800	Mol. Cell. Proteomics 13:372-387(2014);Nat Commun 8:15571(2017);
Q9Y3Y2	CHTOP	Chromatin target of PRMT1 protein	AVAPR(1)MGLR	1	LRGQNLLRGGRAVAPRMGLRRGGVRGRGGPG	5	148	3	0.999989	93.162	577270000	794070000	881470000	728870000	3037400000	317280000	Cell Rep. 9:48-60(2014)
Q9Y4H2	IRS2	Insulin receptor substrate 2	PVSVAGSPLSPGPVR(1)APLSR	1	RPVSVAGSPLSPGPVRAPLSRSHTLSGGCGG	15	396	3	0.999508	138.39	33186000	39676000	54558000	0	2500900	0
Q9Y520-6	PRRC2C	Protein PRRC2C	AMMPPYMFQQYPR(1)MTYPPLHGPMR	1	QYRAMMPPYMFQQYPRMTYPPLHGPMRFPPS	13	255	4	0.999986	105	0	0	7989300	0	10624000	22889000	Mol. Cell. Proteomics 13:372-387(2014)
Q9Y580	RBM7	RNA-binding protein 7	SFSSPENFQR(0.977)QAVMNSALR(0.023)	1	AQIIQRSFSSPENFQRQAVMNSALRQMSYGG	10	143	3	0.977385	66.965	4045900	3662900	0	0	0	0
Q9Y5E7	PCDHB2	Protocadherin beta-2	KMHLQFDR(1)		ARVVSKGKKMHLQFDRQTGDLLLNEKLDREE	8	81	2	1	52.636	107790000	66947000	214350000	0	56969000	57189000
Q9Y6J9	TAF6L	TAF6-like RNA polymerase II p300/CBP-associated factor-associated factor 65 kDa subunit 6L	LFQTAFPAPYGPSPASR(1)YVQK	1	FQTAFPAPYGPSPASRYVQKLPMIGRTSRPA	17	593	3	1	45.094	0	0	0	0	8791000	5108900	Mol. Cell. Proteomics 13:372-387(2014)
Q9Y6Q9-4	NCOA3	Nuclear receptor coactivator 3	QLR(1)MQLQQR	1;2	RANIMRPRTNTPKQLRMQLQQRLQGQQFLNQ	3	1101	2	1	127.12	16518000	19129000	20018000	60750000	201030000	25277000	Mol. Cell. Proteomics 13:372-387(2014);Nat Commun 8:15571(2017);	Nat Commun 8:15571(2017);
Q9Y6Q9-4	NCOA3	Nuclear receptor coactivator 3	MQLQQR(1)LQGQQFLNQSR(1)QALELK	1;2	QLQQRLQGQQFLNQSRQALELKMENPTAGGA	17	1118	4	1	82.651	11659000	5060800	4777300	14857000	29412000	7257300	Mol. Cell. Proteomics 13:372-387(2014);Nat Commun 8:15571(2017);	Nat Commun 8:15571(2017);
Q9Y6Q9-4	NCOA3	Nuclear receptor coactivator 3	MQLQQR(1)LQGQQFLNQSR(1)QALELK	1;2	PRTNTPKQLRMQLQQRLQGQQFLNQSRQALE	6	1107	4	1	153.14	2613400	5060800	0	0	31029000	1782300	Mol. Cell. Proteomics 13:372-387(2014);Nat Commun 8:15571(2017);	Nat Commun 8:15571(2017);
